# Supplementary material for: Aequorea’s secrets revealed: New fluorescent proteins with unique properties for bioimaging and biosensing
Source: PubMed Central journal article supplement (PMC7660908; doi:10.1371/journal.pbio.3000936), 2020-11-02
Supplement: pbio.3000936.s003.pdf [file pbio.3000936.s003.pdf]

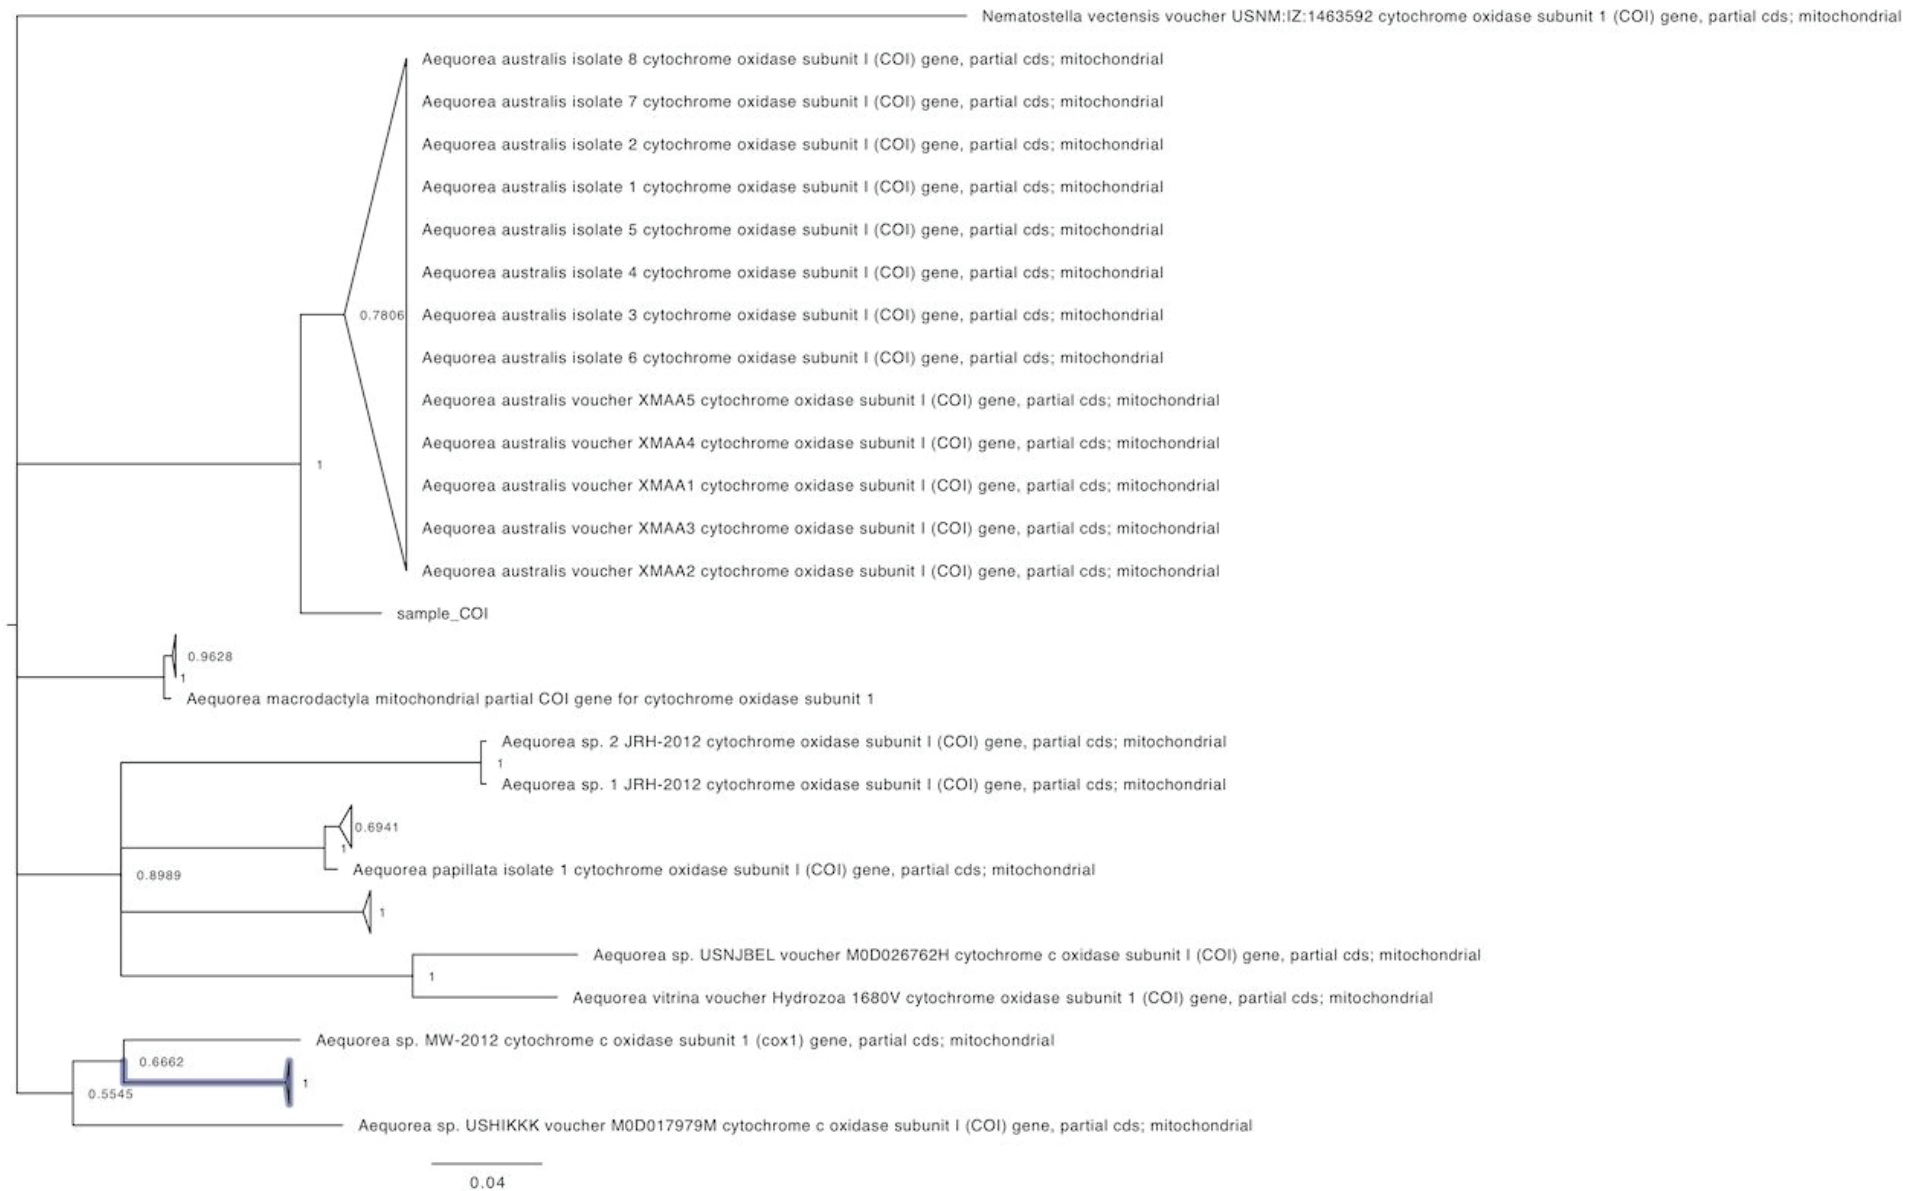

**COI Tree.** The COI tree shows that the reference-corrected COI sequence (sample\_COI) is sister to a large *A. australis* clad. There was no COI sequence identified in the de novo transcriptome so there is no comparison. It is important to note that the sample's COI sequence is bona-fide, even though it was assembled using reference-guided assembly. Therefore the sequence coming out as sister to *A. australis* indicates true relation.
