# Supplementary material for: Aequorea’s secrets revealed: New fluorescent proteins with unique properties for bioimaging and biosensing
Source: PubMed Central journal article supplement (PMC7660908; doi:10.1371/journal.pbio.3000936), 2020-11-02
Supplement: pbio.3000936.s006.pdf [file pbio.3000936.s006.pdf]

# Supplementary Text

Figures and tables included in this supplementary material are numbered **A, B, C**, etc. All other figure and table references below are to the *main text* of the manuscript. Citation numbers refer to the **Supplementary References** list at the end of this document.

## Supplementary Results and Discussion

### Collection and identification of *Aequorea cf. australis* and *Aequorea victoria*

The Great Barrier Reef *Aequorea* specimen (**Fig. 1A, i, ii**) was collected by hand net while blue-water snorkeling at -23.474046, 151.975436. The morphology of the animal was consistent with *A. macrodactyla* specimens collected over the course of several decades [1-3]. Molecular analysis of the 16S, 18S, and COI loci were inconclusive in identifying the animal to a species level, however the COI sequence was similar to that of *A. australis* (see **Morphological Identification** and **Molecular Identification**, below). Thus, we refer to this specimen as *Aequorea cf. australis* to indicate the uncertainty in its true species identity. The *A. victoria* specimen (**Fig. 1A iii, iv**) was part of the dedicated Crystal Jelly exhibit at the Birch Aquarium at Scripps, in which the animals are regularly exposed to violet light and fed a diet of small crustaceans. The species identity of this sample was verified by the presence of avGFP (see below) as well as the 18S sequence, which matched most closely to that of *A. victoria*.

### Identification and characterization of *Aequorea*-derived fluorescent proteins

We performed mRNA-Seq of *A. victoria* and *A. cf. australis* followed by *de novo* transcriptome assembly and homology searches to identify contigs encoding avGFP homologs. In total, we identified five FP-encoding transcripts in *A. victoria* and five in *A. cf. australis*. Amongst these proteins, we found avGFP and close homologs as well as alternative green-emitting FPs with low homology to avGFP. We also discovered a surprising variety of chromoproteins—FP homologs with strong absorbance but very low emission quantum yield that act as pigments of unknown function. Optical characterization of recombinant proteins revealed several unexpected properties among the FP homologs identified in *A. victoria* and *A. cf. australis*, including two photoconvertible chromoproteins in *A. victoria*, a highly red-shifted chromoprotein in *A. cf. australis*, and a very bright green FP in *A. cf. australis*. Below, we describe the most notable properties of each FP. White light and fluorescence images of the full set of purified proteins are shown in **Fig. 1B**, and the absorbance and fluorescence emission spectra are shown in **Fig. 2**. The photophysical properties of all FPs described here are summarized in **Table 1**, and transcript abundances for each FP in the sampled tissues are shown in **Table A**. A multiple sequence alignment is shown in **Fig. A**.

#### *Aequorea victoria*:

##### avGFP

As one might expect given the easily visible green fluorescence of the animal, and the historical success in cloning despite much less advanced technology, we found that transcripts encoding avGFP were the most highly represented of the FP homologs in the *A. victoria* transcriptome, with highest expression in the bell margin and minor presence in other tissues. Interestingly, despite the bright green fluorescence

around the bell margin, we found that this transcript was still represented at relatively low levels (23 transcripts per million (TPM)). We hypothesize that avGFP may have a long half-life *in vivo* and thus require relatively little active transcription to maintain fluorescence in the animal.

| Species                 | Protein | Bell Margin         | Body | Mouth |
|-------------------------|---------|---------------------|------|-------|
| <i>A. victoria</i>      | avGFP   | 38                  | 1.3  | 0.7   |
|                         | AvicFP1 | 0.0                 | 0.3  | 0.0   |
|                         | AvicFP2 | 0.0                 | 1.7  | 0.0   |
|                         | AvicFP3 | 0.0                 | 0.4  | 0.0   |
|                         | AvicFP4 | 8.4                 | 3.7  | 6.6   |
|                         |         |                     |      |       |
|                         |         | <b>Whole Animal</b> |      |       |
| <i>A. cf. australis</i> | AausFP1 | 0.1                 |      |       |
|                         | AausFP2 | 520                 |      |       |
|                         | AausFP3 | 4.6                 |      |       |
|                         | AausFP4 | 22                  |      |       |
|                         | AausGFP | 2.3                 |      |       |

**Table A.** Transcript abundance for FPs in this study, shown as a percent abundance relative to the housekeeping gene GAPDH. Because we sampled only one animal of each species, it is impossible to estimate the error in these data or variance between individuals since only one animal was sampled for each species, but it is clear that many FP transcripts were present at very low levels in the sampled animals—notable examples include all chromoproteins from *A. victoria* and the extremely bright AausFP1 from *A. cf. australis*, which is over 5000-fold less abundant than the chromoprotein AausFP2. The data underlying this table may be found in SRA SRR9606756 through SRR9606760.

The consensus contig for avGFP in the individual *A. victoria* sequenced in this study encodes a protein that differs by one or two conservative amino acid substitutions relative to the originally published avGFP [4]. In our hands, the optical and biochemical properties of the protein remain unchanged relative to its original description. These minor sequence differences between the historically known avGFP and the transcript identified here could be explained by population segregation between Friday Harbor (Shimomura’s original *A. victoria* collection location) and central California, where the ancestors of our specimen were originally collected by the Aquarium of the Pacific, which then supplied cultured animals (an unknown number of generations later) to the Birch Aquarium at Scripps, the source of the sequenced individual.

### AvicFP1

The first surprise among the newly discovered *A. victoria* FPs was an FP with relatively high homology to avGFP (81% amino acid sequence identity, see **Fig. A**). This transcript was represented at much lower levels in our RNA-Seq data and was present only in the “body” and mouth of the animal (~0.06 and 0.38 TPM, respectively). Unlike avGFP, AvicFP1’s absorbance spectrum indicates that it contains an avGFP-type chromophore in the fully anionic state, with a peak at 481 nm and a fluorescence pKa of 4.9, substantially lower than that of EGFP. We speculate that this difference may be largely to the first position in the chromophore tripeptide, which is a cysteine in AvicFP1 rather than the serine present in avGFP. The mutation S65T in avGFP is among the most critical early mutations introduced to generate an all-anionic chromophore, and S65C has been reported as well [5,6].

Because we generated the *E. coli* expression plasmids using synthetic genes, some clones also contained additional mutations derived from errors in the oligonucleotides used for gene assembly. We identified one colony among these initial clones that produced a much larger proportion of mature FP at 37°C. The sequence revealed this clone contained the mutation F64L, another of the early folding mutations identified for avGFP [7]. Unlike avGFP, which required a large number of additional mutations to become truly useful, AvicFP1-F64L already appears to fold and mature nearly optimally under standard mammalian tissue culture conditions with only this single point mutation, which maintains both the brightness and low pKa of the wild-type FP.

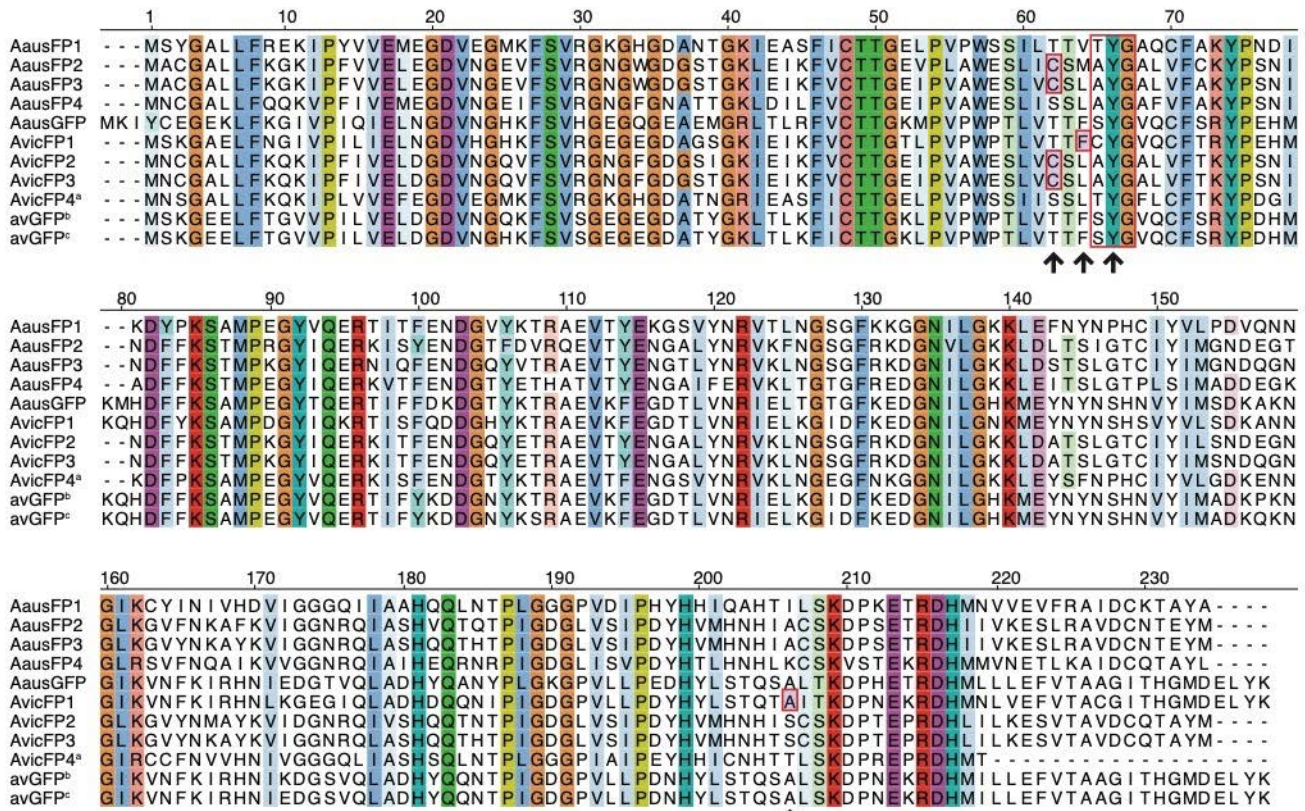

**Figure A.** Amino acid sequence alignment of all fluorescent protein homologs identified in *Aequorea* species in this study. Alignment was done using Clustal Omega [24]. Conserved and semi-conserved residues are colored using the CLUSTAL palette. The chromophore tripeptide is outlined by a black box. Additional residues discussed in the text are indicated by additional black boxes. Amino acid residues numbering from wild-type avGFP is given above each line. The data underlying this figure may be found on GenBank, accession numbers MN114103 through MN114112.

A careful examination of the sequence alignment between AvicFP1 and avGFP revealed that essentially all of the side chains that participate in the weak dimer interface of avGFP are conserved in AvicFP1. Based on this observation, we hypothesized that mutations sufficient to monomerize avGFP variants (i.e. A206K [8]) would also produce a monomeric variant of AvicFP1. Using the organized smooth endoplasmic reticulum (OSER) assay to test for oligomeric behavior in cells [9], we found that the mutant AvicFP1-F64L/A206K displays monomeric behavior equivalent to mEGFP, widely considered the “gold standard” of monomeric FPs [9] (OSER data are summarized in **Table B**). Fusions to LifeAct and H2B displayed the expected localization (**Fig. 4**, **Movie 1**, and **Movie 2**), and did not appear to interfere with mitosis or cell growth based on qualitative observations. We therefore designated this protein “monomeric *A. victoria* fluorescent protein 1,” or **mAvicFP1**.

By all metrics we have evaluated, mAvicFP1, which contains *only two mutations* relative to wild-type AvicFP1, is superior to mEGFP in our hands. Its quantum yield and extinction coefficient are higher, and it can tolerate a wider pH range than mEGFP, making it potentially useful for imaging fusions localized to acidic compartments. We did not explicitly measure the photostability of mAvicFP1, but based on qualitative observations, it appears similar to that of mEGFP. The Y66H and T203Y mutants of AvicFP1, with functional mutations equivalent to those in blue and yellow-green avGFP variants, were also fluorescent in bacterial colonies, though dim (and not characterized here), indicating that this protein is likely to be amenable to additional engineering and optimization. Because this study was focused primarily on identifying and characterizing all of the newly discovered FPs in *Aequorea* species, we did not extensively test mAvicFP1 as a fusion tag beyond our initial experiments, and it is likely that mAvicFP1 can be further improved by directed evolution. However, we soon refocused our efforts on monomerizing **AausFP1** (see below), a much brighter green-emitting FP with much lower homology to avGFP.

| Data on ER Structures |              |     |             |      |                    |        |             |                            |               |
|-----------------------|--------------|-----|-------------|------|--------------------|--------|-------------|----------------------------|---------------|
|                       | Condition    | n   | mean        | sd   | 95CI mean          | median | 95CI median | # normal looking cells (%) | # total cells |
| 1                     | mAvicFP1 - D | 166 | <b>2.18</b> | 0.85 | <b>2.05 - 2.31</b> | 2.03   | 1.88 - 2.24 | 71                         | 260           |
| 2                     | mAvicFP1 - T | 288 | <b>2.44</b> | 0.98 | <b>2.32 - 2.55</b> | 2.27   | 2.14 - 2.39 | 61                         | 257           |
| 3                     | mEGFP - D    | 129 | <b>2.27</b> | 0.86 | <b>2.12 - 2.42</b> | 2.2    | 1.96 - 2.3  | 72                         | 212           |
| 4                     | mEGFP - T    | 27  | <b>2.07</b> | 0.7  | <b>1.78 - 2.35</b> | 2.07   | 1.6 - 2.38  | 76                         | 49            |

**Table B.** Organized smooth endoplasmic reticulum (OSER) assay results for mEGFP (standard monomer) and mAvicFP1, a novel variant of a previously unknown *A. victoria* green FP. Microscopy was performed by Daphne Bindels for conditions mAvicFP1-D and mEGFP-D, and by Talley Lambert for conditions mAvicFP1-T and mEGFP-T. Numbers in bold represent measured values for the ratio between nuclear envelope and ER intensity. The data underlying this table may be found at <https://doi.org/10.26300/4x48-y393>.

### AvicFP2 and AvicFP3

The first chromoprotein (CP) characterized from *A. victoria* matures to a purple-blue color that appears to be completely non-fluorescent, even when measured on our most sensitive instruments. Interestingly however, the chromophore requires blue light to mature to this long-wavelength-absorbing state; when expressed and purified in total darkness, AvicFP2 is weakly green fluorescent with excitation and emission spectra suggesting an anionic avGFP-type chromophore. Exposure to a moderate intensity of blue light induces rapid conversion to the mature chromoprotein state within seconds to minutes. Like all other *Aequorea* species CPs discovered in this study, AvicFP2 contains a conserved cysteine residue that is most likely responsible for forming a previously undescribed chromophore structure in the fully mature state (see detailed discussion below).

AvicFP3 is a second chromoprotein that is highly homologous to AvicFP2 (96% amino acid identity, see **Fig. B**). Like AvicFP2, AvicFP3 is green fluorescent when expressed and purified in the dark, and converts to a green-absorbing chromoprotein when exposed to blue light. AvicFP3 qualitatively appears to be more light-sensitive in its immature state than AvicFP2, making measurement of the fully immature protein nearly impossible in our hands. Alternatively, AvicFP3 may be capable of partially maturing in the dark under some conditions. Both AvicFP2 and AvicFP3 transcripts were only found in the “body” of the animal, and were expressed at low levels (~0.38 and ~0.09 TPM, respectively).

## AvicFP4

One transcript in the initial *A. victoria* transcriptome assemblies appeared to encode an additional incomplete GFP homolog, however the transcript appeared to be misassembled upon inspection with mapped reads. We therefore went back and used only the reads mapping to this partial GFP transcript as the input for a new *de novo* assembly and found that one contig in this assembly encoded a full-length ortholog to AausFP1 (discussed below). This transcript is present in all sampled tissues at moderate levels (between 1.67 and 5.11 TPM). AvicFP4 has low sequence identity to avGFP (52% amino acid identity). When expressed in *E. coli* at 37°C, AausFP4 folds and matures efficiently into a highly soluble green-emitting FP with narrow peaks and a short Stokes shift. While it has a relatively high extinction coefficient, its quantum yield is much lower than is typical of wild-type green-emitting FPs. Thus, while this protein may provide many interesting insights into determinants of quantum yield and spectral shape, we did not characterize it beyond measuring its core optical properties.

## *Aequorea cf. australis*:

### AausGFP

*A. cf. australis* expresses one fluorescent protein that appears to be an ortholog to avGFP (81% amino acid identity).

AausGFP has optical and biochemical properties very similar to those of wild-type avGFP, suggesting that it may also be functionally equivalent in this species.

However, AausGFP was expressed at relatively low levels (9 TPM) compared with other FP homologs in the same animal. We anticipate that enhanced green, yellow, cyan, and blue variants of AausGFP can be produced with similar amino acid substitutions to those used to produce avGFP color variants. AausGFP can likely be monomerized similarly to avGFP, given the high degree of sequence conservation between the proteins. However, since its properties are neither novel nor superior to existing FPs, we did not explore this protein beyond these initial characterization and mutagenesis experiments.

### AausFP1

Among the many surprises amongst the *Aequorea* species transcriptomes studied here, we discovered a second green-emitting FP in *A. cf. australis* with very low homology to avGFP (53% amino acid identity). AausFP1 was expressed at very low levels relative to other FPs in the individual sequenced (0.36 TPM), and would be unlikely to appear in cDNA expression-cloning libraries, thus making the transcriptomic approach used in this study one of the few approaches capable of elucidating the existence of this FP. In

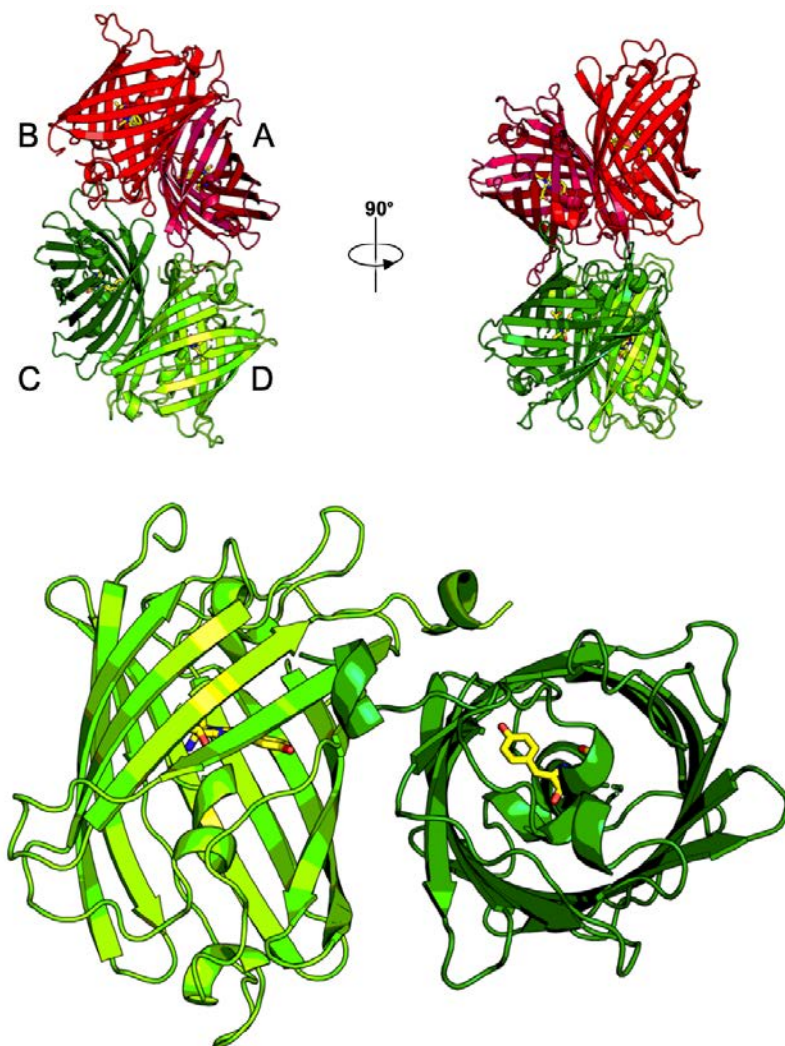

**Figure B.** Cartoon diagram of the AausFP1 unit cell and likely physiological dimer. The four protein subunits in the unit cell are labeled A through D. The data underlying this figure may be found at PDB 6S67.

fact, only 43 reads out of ~25M reads mapped to the AausFP1 transcript (see **Verifying Newly Identified Transcripts** below). Despite low expression in its native context, wild-type AausFP1 expresses and folds very efficiently in *E. coli* at 37°C without any modifications.

Most importantly, AausFP1 displays truly remarkable optical properties: narrow excitation and emission peaks, nearly perfect QY (close to 1.0), and the highest extinction coefficient yet measured for any fluorescent protein ( $170,000 \text{ M}^{-1}\text{cm}^{-1}$ ). Together, these properties make AausFP1 the brightest fluorescent protein currently known in the avGFP superfamily, including engineered variants. The emission peak of AausFP1 has a full width at half maximum (FWHM) of 19nm, compared to 40nm for fluorescein, 32nm for EGFP, and 28nm for mNeonGreen (calculated from spectra taken in this work). Such a narrow emission spectrum is highly desirable for multi-color fluorescence imaging because it minimizes bleed-through to long wavelengths while allowing efficient collection of emission light from a narrow wavelength band. However, like many wild-type hydrozoan fluorescent proteins, AausFP1 is an obligate dimer, as verified by X-ray crystallography.

### AausFP2 and AausFP3

The most highly expressed FP homolog in *A. cf. australis* is a chromoprotein with a cyan-blue pigmented appearance when expressed in *E. coli* (see **Fig. 1B**). AausFP2 possesses an unusually-shaped, broad absorbance spectrum peaking at 610 nm. The apparent absence of a classical sharp peak with a short-wavelength shoulder indicates that the chromophore and/or chromophore environment of this protein must also be highly unusual. Indeed, this is what we discovered in the solved crystal structure (detailed discussion below). Like the *A. victoria* chromoproteins, AausFP2 has no measurable fluorescence emission, even on our most sensitive instruments. Like all *Aequorea* species chromoproteins, AausFP2 appears to be dimeric when run on a non-denaturing SDS-PAGE gel (this oligomerization state was also confirmed by X-ray crystallography, see **Fig. C** and discussion below). AausFP2 was represented far more highly than any other FP found in this study, at over 2,000 TPM.

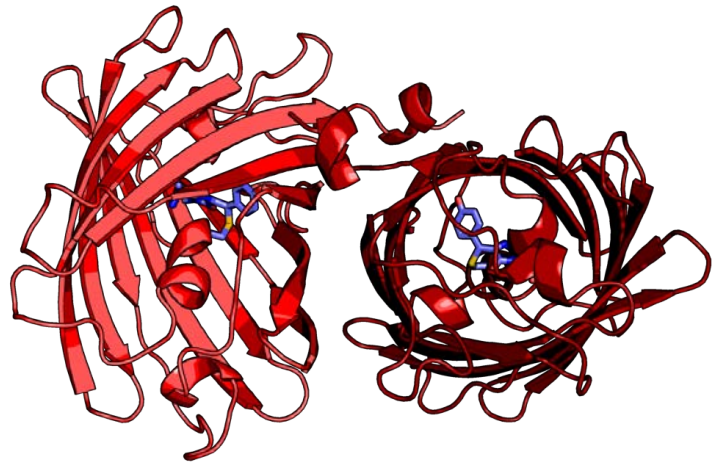

**Figure C.** Cartoon diagram of the probable AausFP2 physiological dimer. The data underlying this figure may be found at PDB 6S68.

*A. cf. australis* expresses a second chromoprotein, AausFP3, similar to AausFP2, but blue-shifted approximately 20 nm relative to its closest homolog. AausFP3 displays a similarly symmetrical, shoulderless absorbance peak, but with a maximum at 590 nm. The transcript encoding AausFP3 is present at lower levels than that of AausFP2 (~18 TPM). Unlike the *A. victoria* chromoproteins, AausFP2 and AausFP3 do not require light for maturation, but instead form their mature blue-pigmented chromophores equally well in the dark. The potential biological functions of these chromoproteins, as well as those from *A. victoria*, are currently unknown.

### AausFP4

The final surprising discovery among the *Aequorea* species FPs is AausFP4, a very weakly green-emitting FP (quantum yield < 0.001) with photochromic behavior strikingly similar to that of the engineered avGFP variant Dreiklang [10]. AausFP4 is expressed at moderate levels in the individual sequenced in this study (~87 TPM). When expressed or stored in the dark, AausFP4 reaches an equilibrium state with a

major absorbance peak at 338 nm (**Fig. 2**), indicating that the chromophore is neutral and missing at least one double bond relative to a mature GFP-type chromophore. Upon exposure to UV light, AausFP4 rapidly converts entirely to an anionic GFP-like state with 477 nm peak absorbance (**Fig. 2**). This transformation is reversible by exposure to bright blue light or by storage in the dark. Together, these properties suggest a mechanism similar to that of Dreiklang, in which a structural water molecule can reversibly hydrate the imidazolinone ring of the chromophore in a light-dependent manner [10]. A key difference between AausFP4 and Dreiklang is the absence of a  $\sim 400$  nm absorbance peak in the “on” state, and off-switching mediated by blue rather than violet light. While AausFP4 is likely to be dimeric like its closest relatives (AausFP2 and AausFP3), it may prove to be a useful starting material from which to engineer a new lineage of reversibly photoswitchable FPs. To our knowledge, AausFP4 is also represents the first likely naturally-occurring example of Dreiklang-type photoswitching to be discovered.

### Novel FP structural features

The highly unusual optical properties of AausFP1 and AausFP2 made them attractive targets for structural characterization. We obtained X-ray diffraction from crystals of these two FPs and solved their structures at 2.47 and 2.06 Å resolution, respectively. Data collection and reduction statistics are given in **Table C**, and critical structural features are shown in detail in **Figs. D – H**.

**Oligomerization state analysis.** While both crystal forms contain two different asymmetric unit contents with 4 monomers for AausFP1 (**Fig. 5**) and 1 monomer for AausFP2, both structures strongly suggest that the two proteins are physiologically organized as dimers (see Methods section) (**Fig. B, Fig. C**). The dimer interfaces of these two proteins are highly similar to each other (**Figs. E and F**), but, surprisingly, are completely different from that of avGFP [11]. The analysis of residue interactions at these interfaces has provided crucial information for successfully engineering monomeric variants of these proteins (to be published separately).

**Structural analysis of the AausFP1 chromophore.** Particularly high values of the fluorescence quantum yield and molar extinction coefficient in an FP suggest the presence of an unusual chromophore conformation and/or environment. At first glance at the AausFP1 chromophore, its nearly perfect planarity (**Fig. 5**) and its

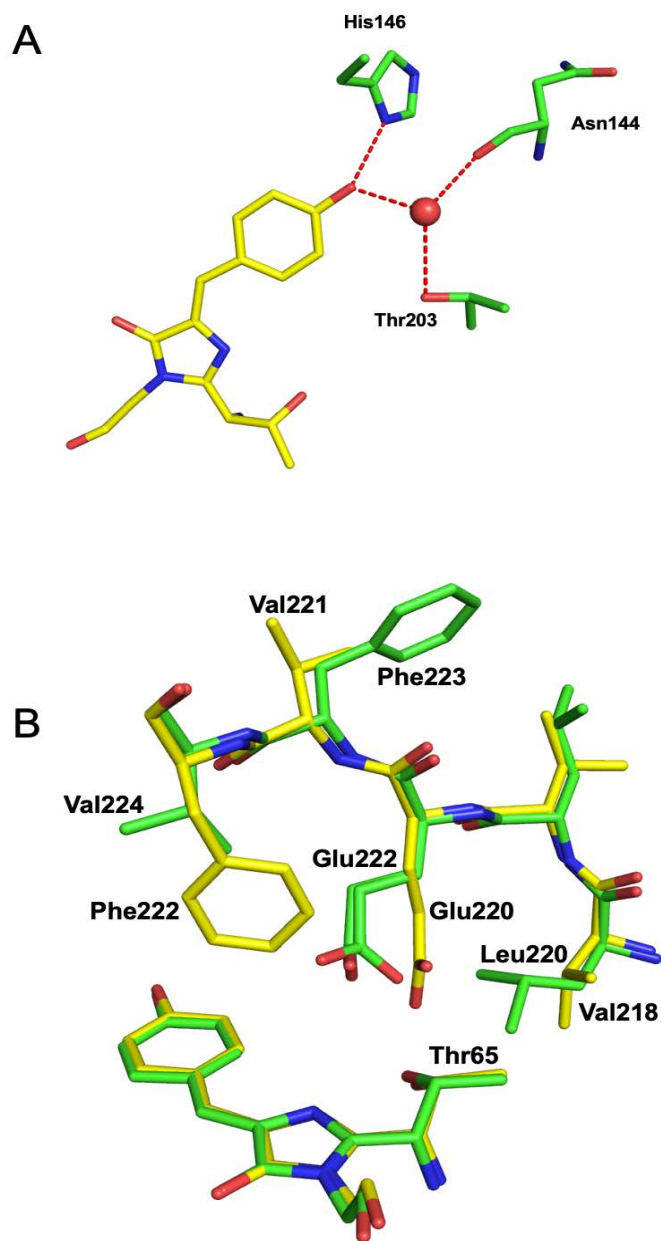

**Figure D.** Hydrogen bonds stabilizing the AausFP1 chromophore phenolate (A) and a comparison between AausFP1 (yellow) and EGFP (green) positioning of residues near the chromophore. The data underlying this figure may be found at PDB 6S67.

stabilization via hydrogen bonds of the (deprotonated) phenolate oxygen to a neighboring histidine residue and a stable water molecule (**Fig.D**, panel **A**) resemble those of other common fluorescent proteins such as EGFP (“Enhanced” avGFP, an early and still commonly-used derivative) [7].

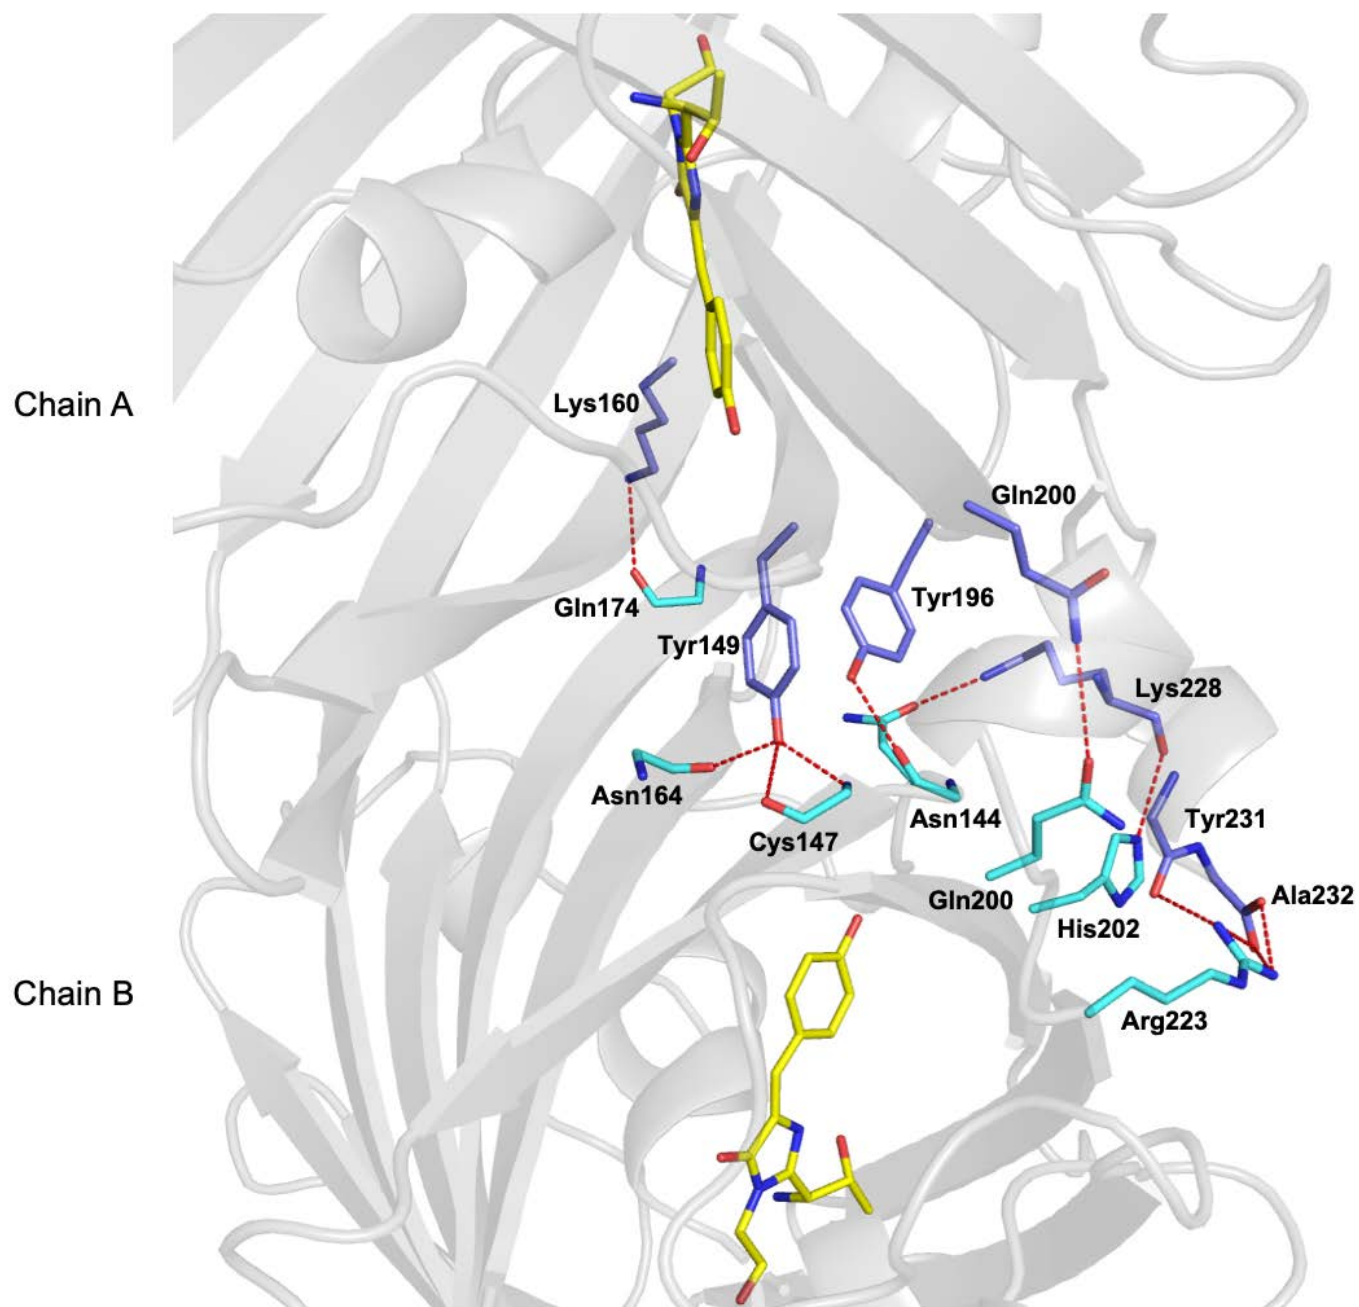

**Figure E.** A diagram of the critical interactions comprising the AausFP1 dimer interface. The data underlying this figure may be found at PDB 6S67.



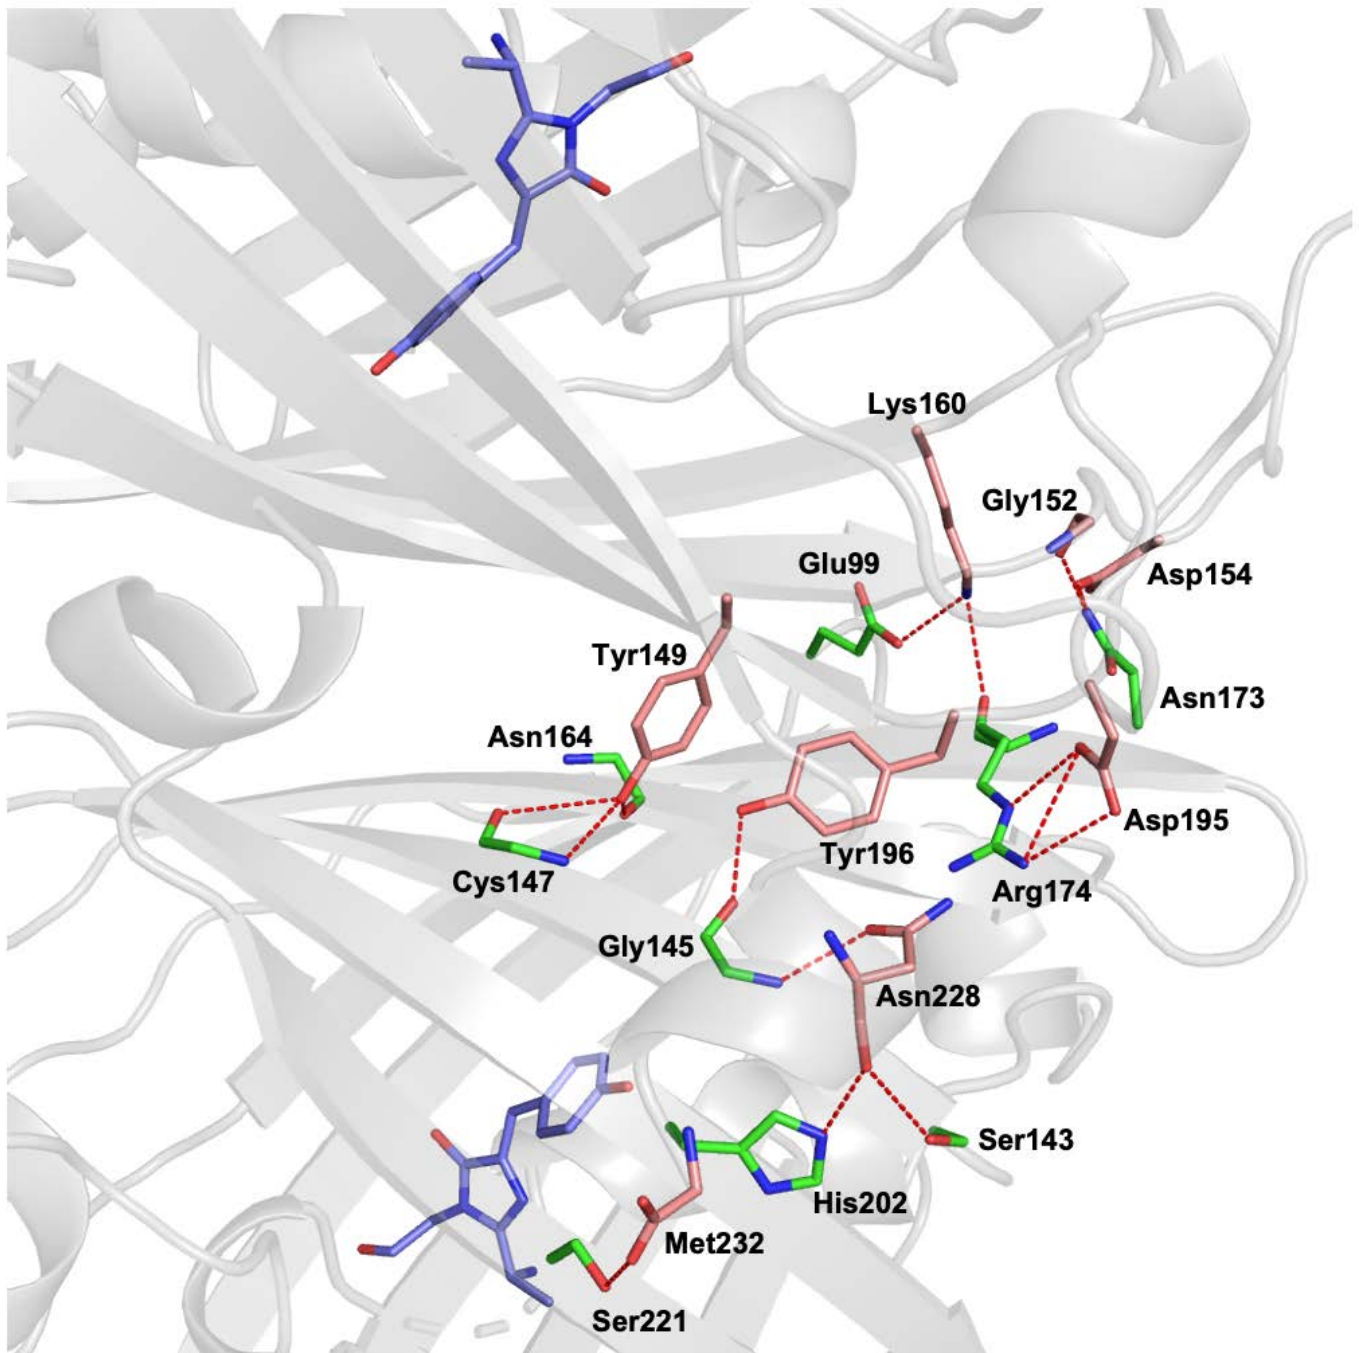

**Figure F.** A diagram of the critical interactions comprising the AausFP2 dimer interface. The data underlying this figure may be found at PDB 6S68.

However, a closer comparison with the chromophore environment of EGFP, which contains a chemically identical chromophore derived from a Thr-Tyr-Gly tripeptide (**Fig. D**, panel **B**), indicates that the glutamate residue conserved almost universally in known FPs (Glu220) is translated towards the chromophore residues (n-1) (Thr65) and (n+1) (Gly67), which displaces a conserved negative charge interacting with the delocalized electron cloud of the chromophore. It is unclear what effect this change may have on the quantum yield or extinction coefficient of the chromophore or its spectral shape.

The most striking features of the AausFP1 chromophore environment are revealed by analysis of the interactions surrounding the phenolate ring (**Fig. 4A** and **Fig. G**), which are almost exclusively van der Waals interactions. In EGFP, these interactions weakly engage residue atoms less than 4.0 Å from the phenolate ring (**Fig. D**, panel **B**). Interestingly the three shortest interatomic distances for van der Waals interactions with the EGFP chromophore ( $\leq 3.5$  Å) all include an oxygen (polar) atom (see **Table D**). The EGFP chromophore environment also features an angular sector around the phenolate ring that is entirely deprived of interactions (**Fig. G**, panel **D**), potentially leaving room for the chromophore to deform when relaxing from the excited state, and thus releasing its energy via a non-radiative pathway.

Unlike EGFP, there are many residues in AausFP1 that interact with the phenolate ring via (hydrophobic) carbon atoms. These interactions can be visualized as two larger “rings”: one around atoms  $C_\gamma$ ,  $C_{\delta 1}$  and  $C_{\delta 2}$  and one around  $C_{\epsilon 1}$ ,  $C_{\epsilon 2}$ ,  $C_\zeta$  and  $O_\eta$  (beige areas on **Fig. G**, panel **A**). Among the five closest interactions ( $\leq 3.5$  Å), two include an oxygen atom and three include only carbon atoms (see **Table E**). The side-on view of the chromophore (**Fig. G**, panel **C**) reveals that the asymmetry of interactions present in EGFP is abolished in AausFP1, and that the phenolate ring is perfectly locked in place by all interacting residues, essentially restricting any potential deformation around the methylene bridge. These substantial differences provide a sound

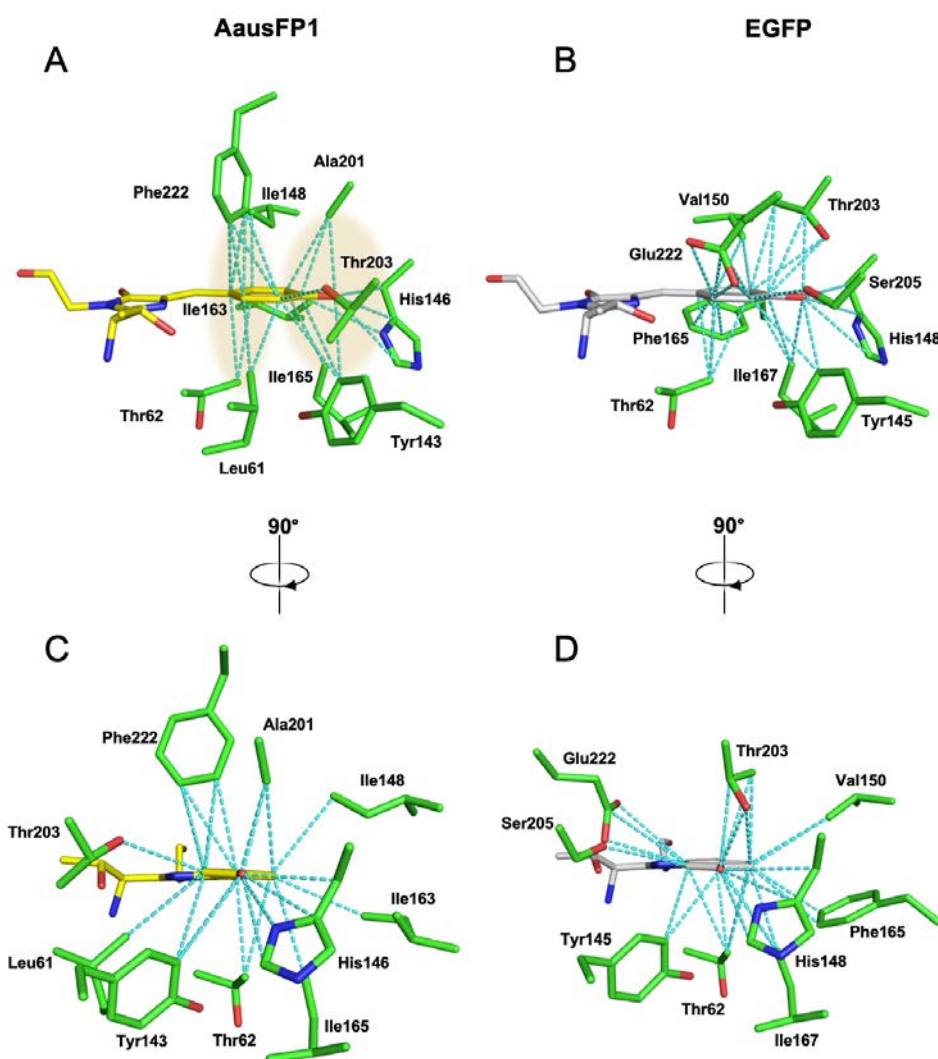

**Figure G.** Two side-on views of van der Waals interactions in the AausFP1 and EGFP chromophore environments. AausFP1 (A, C) and EGFP (B, D) are viewed from the “right side” of the chromophore (A, B) and from the angle looking head-on at the chromophore phenolate. The data underlying this figure may be found at PDB 6S67.

explanation for the very high quantum yield and unusually narrow excitation and emission peaks of AausFP1 relative to EGFP.

**Structural analysis of the AausFP2 chromophore.** Unlike the AausFP1 chromophore, the configuration and conformation of the AausFP2 chromophore are unlike those of any previously described fluorescent protein homolog. The residue one turn away from the chromophore on the N-terminal side of the chromophore-bearing helix is a cysteine (Cys62) which is engaged in a covalent bond with the central carbon ( $C_{\beta}$ ) of the methylene bridge of the chromophore (**Fig. H**). This covalent bond is equivalent to the substitution of a hydrogen by a sulfur atom, preserving the delocalization of the electron cloud and the visible light absorption properties of the chromophore. In addition, the residues surrounding the AausFP2 chromophore provide an asymmetric environment that results in a further twisting of the chromophore thanks to a van der Waals ‘clamp’ formed by the residues Asn201, Ile203, and Glu220 (**Fig. H**). We verified the role of Cys62 by examining the C62S mutant of AausFP2, and as predicted, the mutant was unable to form a red-absorbing chromophore and instead absorbed strongly in the blue region of the visible spectrum (**Fig. I**).

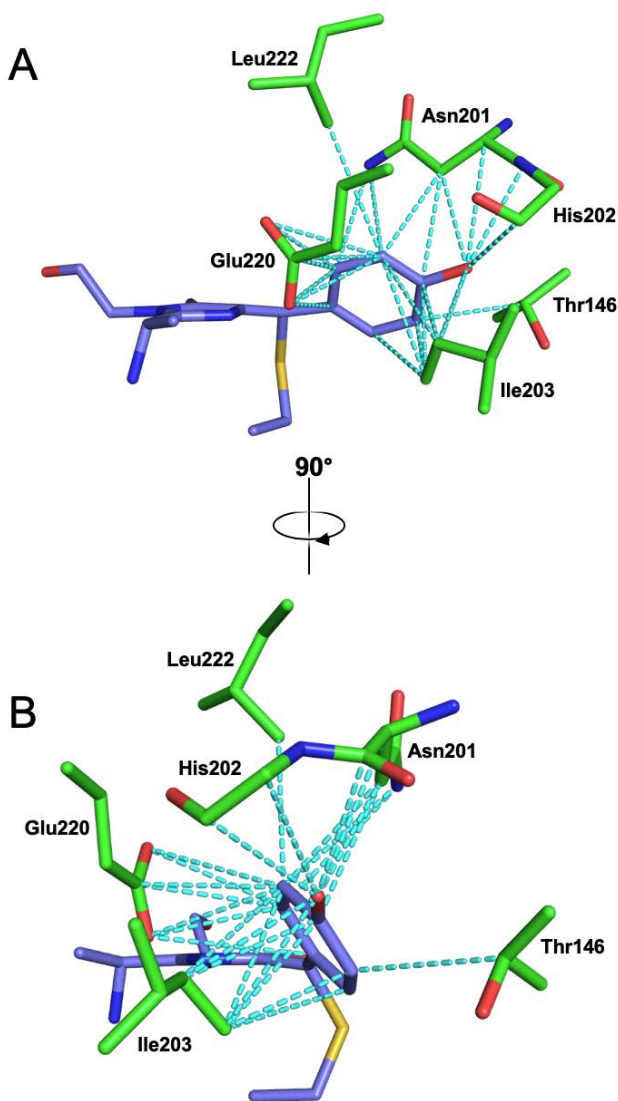

**Figure H.** Two side-on views of van der Waals and other interactions in the AausFP2 chromophore environment. The data underlying this figure may be found at PDB 6S68.

and shows that this is due to both the presence of a sulfur atom in the chromophore and to the twisting of the structure due to the covalent bond to the cysteine.

**Modeling of the AausFP2 chromophore absorption properties.** The effects of the sulfur substitution at the  $C_{\beta}$  position in an EGFP-like chromophore were modeled with quantum mechanical calculations and appear to be, in combination with the twisting of the two rings, the most probable explanation for the large red-shift in absorbance of AausFP2 relative to EGFP. Calculations of the energetic vertical transition between the ground state and the first six excited states were done on models of the chromophore constructed from the crystallographic structures of avGFP-F64L/S65T (Protein Data Bank entry code 2Y0G, [12]) and the structure of AausFP2 reported here. Calculations of the vertical transition on small models reproduced the large red-shift of the absorption maximum of AausFP2 relative to EGFP,

Calculations were performed on a set of a total of 8 models in order to analyze the influence on the absorption wavelength of the conformations, the protonation state and the presence of the mercapto group. The models (name and formula) are gathered in **Fig. J**. For each model, the time-dependent density functional theory (TD-DFT) calculations of the vertical transitions were conducted for the first 6 singlet excited states at the B3LYP/6-31+G(d,p) level [13,14]. The wavelengths of the most intense transition

(bigger oscillator strength) are reported in **Table F**. The main contribution of the transition has a HOMO-LUMO character.

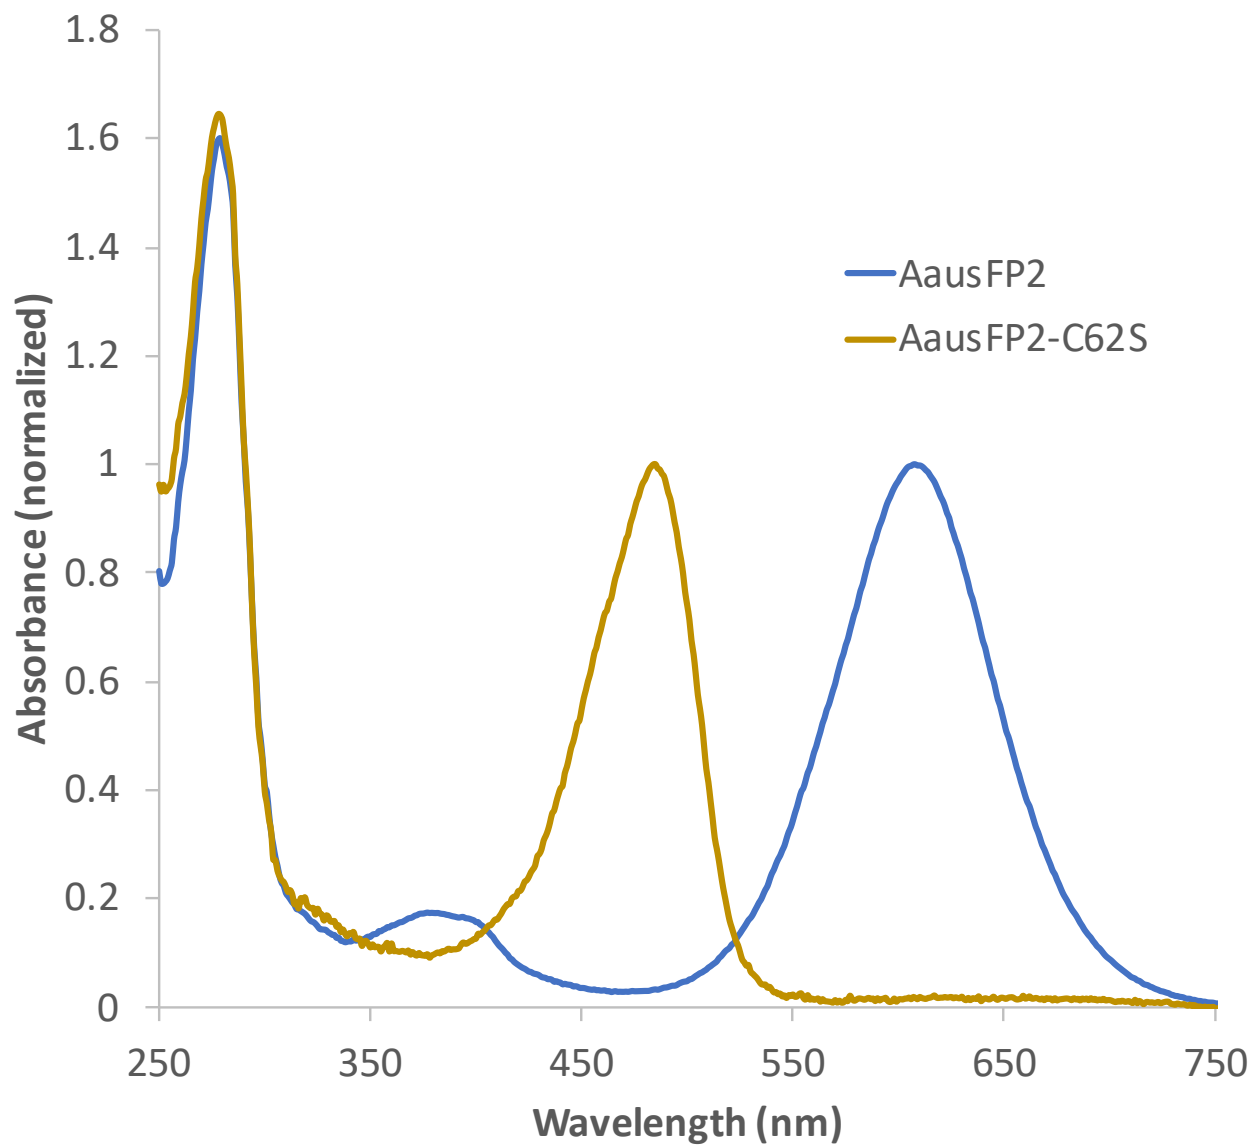

**Figure I.** Normalized absorbance spectra for AausFP2 and its C62S mutant.

|                                           | <b>AausFP1</b>                                | <b>AausFP2</b>             |
|-------------------------------------------|-----------------------------------------------|----------------------------|
| <b>Data reduction</b>                     |                                               |                            |
| Wavelength (Å)                            | 0.979                                         | 0.976                      |
| Space group                               | P2 <sub>1</sub> 2 <sub>1</sub> 2 <sub>1</sub> | C222 <sub>1</sub>          |
| Cell dimensions                           |                                               |                            |
| <i>a</i> , <i>b</i> , <i>c</i> (Å)        | 65.08, 101.41, 161.43                         | 54.41, 75.13, 100.41       |
| $\alpha$ , $\beta$ , $\gamma$ (°)         | 90.0, 90.0, 90.0                              | 90.0, 90.0, 90.0           |
| Resolution range <sup>†</sup> (Å)         | 50.0 – 2.47 (2.53 – 2.47)*                    | 50.0 – 2.06 (2.11 – 2.06)  |
| Wilson <i>B</i> -factor (Å <sup>2</sup> ) | 37.9                                          | 38.0                       |
| No. of reflections                        | 228,828 (16,791)                              | 78,841 (5,174)             |
| Unique reflections                        | 39,086 (2845)                                 | 13,079 (976)               |
| Multiplicity                              | 5.9 (5.9)                                     | 6.0 (5.3)                  |
| Completeness (%)                          | 99.9 (99.9)                                   | 99.8 (99.7)                |
| Mean <i>I</i> /sigma( <i>I</i> )          | 9.7 (2.1)                                     | 12.8 (2.2)                 |
| <i>R</i> <sub>meas</sub> <sup>‡</sup> (%) | 21.5 (120.3)                                  | 10.0 (85.1)                |
| CC <sub>1/2</sub>                         | 0.993 (0.707)                                 | 0.998 (0.683)              |
| <b>Structure refinement</b>               |                                               |                            |
| Resolution (Å)                            | 48.42 – 2.47 (2.50 – 2.47)                    | 44.11 – 2.06 (2.09 – 2.06) |
| <i>R</i> <sub>work</sub> (%)              | 18.2 (29.5)                                   | 16.7 (23.8)                |
| <i>R</i> <sub>free</sub> (%)              | 22.8 (34.6)                                   | 20.2 (31.7)                |
| No. of atoms                              |                                               |                            |
| Protein                                   | 7566                                          | 1936                       |
| Solvent                                   | 7196                                          | 1788                       |
| <i>B</i> -factors (Å <sup>2</sup> )       | 370                                           | 148                        |
| Protein                                   | 34.9                                          | 34.5                       |
| Solvent                                   | 34.9                                          | 34.0                       |
| R.m.s. deviations                         | 34.6                                          | 44.2                       |
| Bond lengths (Å)                          | 0.009                                         | 0.009                      |
| Bond angles (°)                           | 1.66                                          | 1.69                       |

<sup>†</sup>Resolution cutoff based on CC<sub>1/2</sub>. \*Values in parentheses are for the outer shell. <sup>‡</sup>R<sub>meas</sub> = R<sub>merge</sub> × [N/(N – 1)]<sup>1/2</sup>, where N is data multiplicity.

**Table C.** Data reduction and structure refinement statistics for the structure determination of AausFP1 and AausFP2.

| EGFP                  |              |                   |              |
|-----------------------|--------------|-------------------|--------------|
| Chromophore atom name | Residue name | Residue atom name | Distance (Å) |
| CG2/CD1               | Thr62        | CG2               | 3.7/3.7      |
| CE2/OH                | Tyr145       | CE2               | 3.9/3.4      |
| OH                    | His148       | ND1               | <b>2.9</b>   |
| CD1/CE1               | Val150       | CG2               | 3.8/3.8      |
| CD1                   | Phe165       | CE2/CZ            | 3.8/3.9      |
| CE1/OH                | Ile167       | CD1               | 3.7/3.9      |
| OH                    | Thr203       | OG1               | <b>2.7</b>   |
| CE1                   | Thr203       | CG2               | 3.8          |
| CE2                   | Ser205       | OG                | 3.9          |
| CD2                   | Glu222 [A]   | OE2               | 3.8          |
| CE2                   | Glu222 [A]   | OE1               | 3.5          |
| CD2                   | Glu222 [B]   | OE2               | 3.5          |
| OH                    | Water        | HOH               | <b>2.6</b>   |

**Table D.** Interactions at 4.0 Å and below between the conjugated ring of the chromophore and the protein in the structure of EGFP (PDB ID: 2Y0G). The three hydrogen bond distances are highlighted in red.

| AausFP1               |              |                   |                 |
|-----------------------|--------------|-------------------|-----------------|
| Chromophore atom name | Residue name | Residue atom name | Distance (Å)    |
| CD2/CE2               | Leu61        | CD1               | 3.7/3.7         |
| CG2/CD1               | Thr62        | CG2               | 3.8/3.8         |
| CE2/OH                | Tyr143       | CE2               | 4.0/3.7         |
| OH                    | His146       | CB/ND1            | 3.5/ <b>2.7</b> |
| CD1                   | Ile148       | CD1               | 3.8             |
| CD1                   | Ile163       | CD1               | 4.0             |
| CE1                   | Ile165       | CD1               | 3.8             |
| OH/CZ                 | Ala201       | CB                | 3.3/3.4         |
| CE2                   | Thr203       | OG1               | 3.6             |
| CD2                   | Phe222       | CE1/CZ            | 3.5/3.4         |
| OH                    | Water        | HOH               | <b>2.6</b>      |

**Table E.** Interactions at 4.0 Å and below between the conjugated ring of the chromophore and the protein in monomer A of the structure of AausFP1 (PDB ID: 6S67). The two hydrogen bond distances are highlighted in red.

The models that best represent the chromophore in AausFP2 are the protonated and deprotonated forms Anionic-SH<sub>AausFP2</sub> and Neutral-SH<sub>AausFP2</sub>. The corresponding absorption maximum wavelength (640 and 690 nm) represent large red shifts compared to those of the anionic form of the chromophore in EGFP (Anionic-H<sub>EGFP</sub>) (470 nm). As models do not take into account the environment, the present calculations only give trends on the position of absorption maxima and not their precise values.

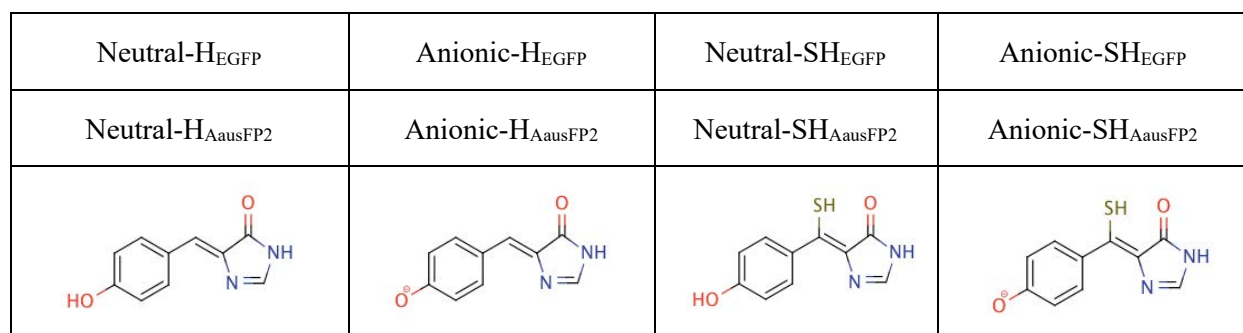

**Figure J:** planar representation of the 8 models for the calculations.

The presence of the cysteine in the structure of the AausFP2 protein can influence the vertical transition in two ways: (1) the presence of the electronic density of the sulfur atom in the electronic states and/or (2) the steric constraint on the structure of the chromophore. In order to decipher the two influences, we can first compare the substitution of the -H by -SH group on the predicted peak absorbance wavelength. For the planar chromophore structure (derived from EGFP), the substitution has *no influence* on the wavelength of either the neutral or anionic forms of the chromophore. The transition is, however, less intense (smaller *f* values). For the twisted chromophore structure (derived from AausFP2), the substitution of -SH by -H produces a blue shift of the wavelength of 140 and 260 nm for anionic and neutral forms, respectively. From this, we conclude that the substitution of H by SH has an influence only when the structure is twisted.

Interestingly, twisting the structure of a non-substituted chromophore has almost no influence (less than 35 nm), while twisting has a major influence on the sulfur-substituted chromophore (170 to 270 nm for anionic and neutral forms, respectively). The absorbance maxima of twisted chromophores are shifted to the red compared to the planar ones, while the intensity of the transition is lowered (smaller *f*). We can conclude in the present study that the covalent bond between the chromophore and the cysteine has the effect of red-shifting the absorbance spectra by both twisting the chromophore and changing the electronic density due to the presence of the sulfur atom.

| Model                         | Excited state | Transition energy (eV) | Wavelength (nm) | $f$  |
|-------------------------------|---------------|------------------------|-----------------|------|
| Anionic-H <sub>EGFP</sub>     | S2            | 2.66                   | 466             | 0.81 |
| Anionic-SH <sub>EGFP</sub>    | S2            | 2.66                   | 467             | 0.64 |
| Neutral-H <sub>EGFP</sub>     | S2            | 3.02                   | 411             | 0.60 |
| Neutral-SH <sub>EGFP</sub>    | S1            | 3.00                   | 413             | 0.33 |
| Anionic-H <sub>AausFP2</sub>  | S2            | 2.47                   | 501             | 0.65 |
| Anionic-SH <sub>AausFP2</sub> | S1            | 1.93                   | 641             | 0.25 |
| Neutral-H <sub>AausFP2</sub>  | S2            | 2.94                   | 421             | 0.50 |
| Neutral-SH <sub>AausFP2</sub> | S1            | 1.80                   | 688             | 0.13 |

**Table F:** Energy of the most intense vertical transition for the different models (in eV), corresponding wavelength (nm) and oscillator strength ( $f$ ).

| AausFP2               |              |                   |                 |
|-----------------------|--------------|-------------------|-----------------|
| Chromophore atom name | Residue name | Residue atom name | Distance (Å)    |
| CE2                   | Thr146       | CB                | 3.8             |
| OH                    | Asn201       | C/O               | 3.2/3.5         |
| CE1/OH                | Asn201       | CB                | 3.3/3.2         |
| CD1/CE1               | Asn201       | ND2               | 3.9/3.9         |
| OH                    | His202       | N                 | 3.5             |
| CE2                   | Ile203       | CD1               | 3.2             |
| OH                    | Ile203       | CG1               | 3.3             |
| N2/CD1                | Glu220       | OE2               | 3.3/ <b>2.7</b> |
| CD1/CE1               | Glu220       | CD                | 3.4/3.6         |
| CD1                   | Glu220       | OE1               | 3.5             |
| CE1                   | Leu222       | CD2               | 4.0             |
| OH                    | Water        | HOH               | <b>2.4</b>      |

**Table G.** Interactions at 4.0 Å and below between the conjugated ring of the chromophore and the protein in the structure of AausFP2 (PDB ID: 6S68). The two hydrogen bond distances are highlighted in red.



## Morphological identification

We identified the *Aequorea* individual collected near Heron Island, Queensland using the morphological characters (Figs. K, L, M, and N):

- **Bell shape:** Thin and gently convex
- **Diameter of bell:** 30.9mm
- **Number of radial canals:** 49
- **Tentacle pattern:** 3-4 radial canals with no tentacle, then one radial canal with a tentacle
- **Number of tentacles:** 12
- **Gonad shape:** Bilamellar, extending nearly the whole length of the radial canals
- **Stomach size:** Damaged, unknown
- **Tentacle shape:** tentacle bulb tapers adaxially from the margin to a fine point. There is an abaxial keel on each tentacle bulb where the bulb meets the bell margin.

In *Aequorea* the tentacle shape, gonad shape, number of tentacles, and number of radial canals are all strong characters with which to identify a specimen. Overall, the characters listed above closely match the original description of *A.*

*macrodactyla* and further characterizations of the species in later publications. The unique tentacle shape closely matches Kramp's 1961 drawings of *A. macrodactyla* [2]. The number of radial canals the number of tentacles, the bell size, and the tentacle pattern match Kramp's review of *A. macrodactyla* specimens over many size ranges and locales [3]. The shape of the bell and the shape and distribution of the gonads match the original species description [1].

The characters above unambiguously rule out this individual as belonging to sympatric species: *A. australis*, *A. conica*, *A. parva*, *A. globosa*, and

*A. pensilis*. The bell of this *Aequorea* specimen is too thin and the gonads are much longer than those found in *A. australis* [15]. The bell shape is also too thin, the number of tentacles is too few and the bell width is too large to be either *A. parva* or *A. conica* [16], *A. globosa*, or *A. pensilis*.

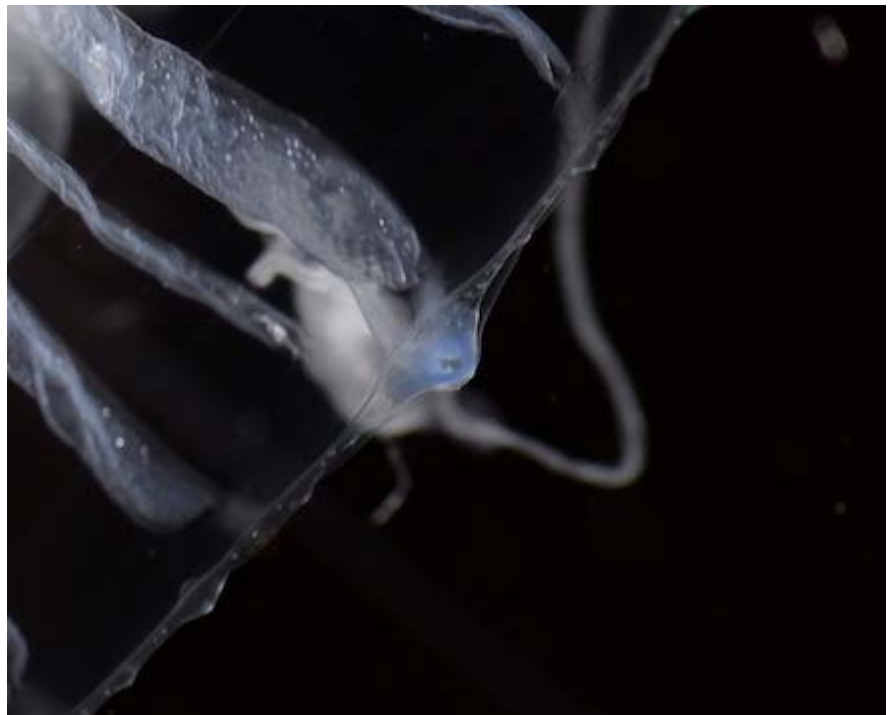

**Fig. K.** The abaxial keel on each tentacle bulb.

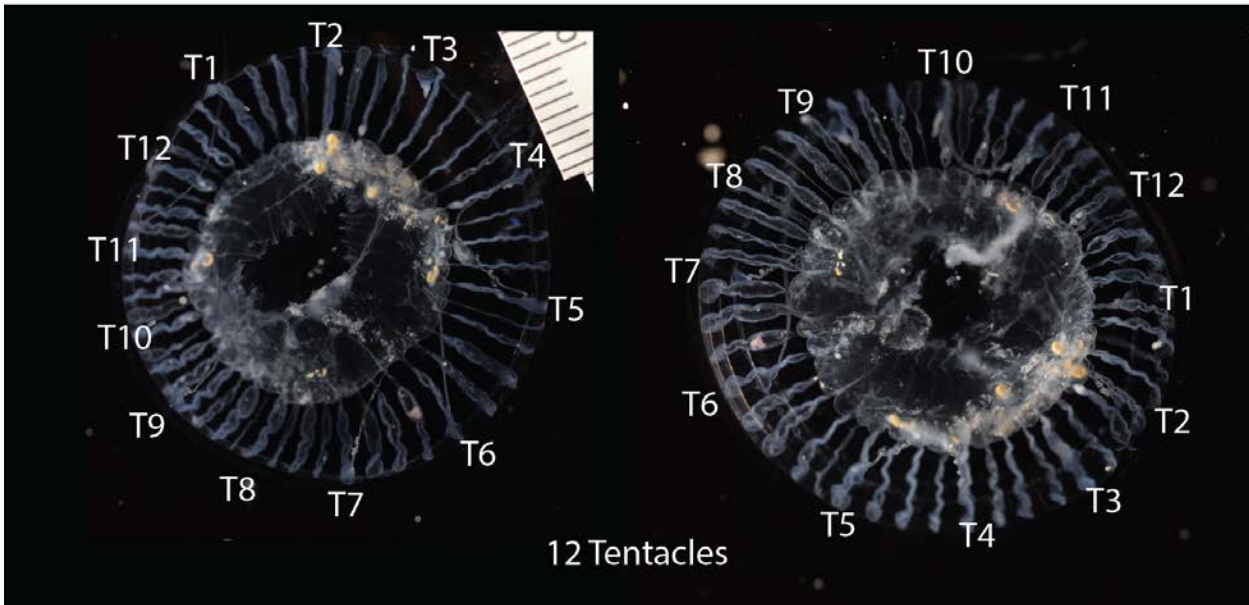

**Fig. L.** The specimen had 12 tentacles.

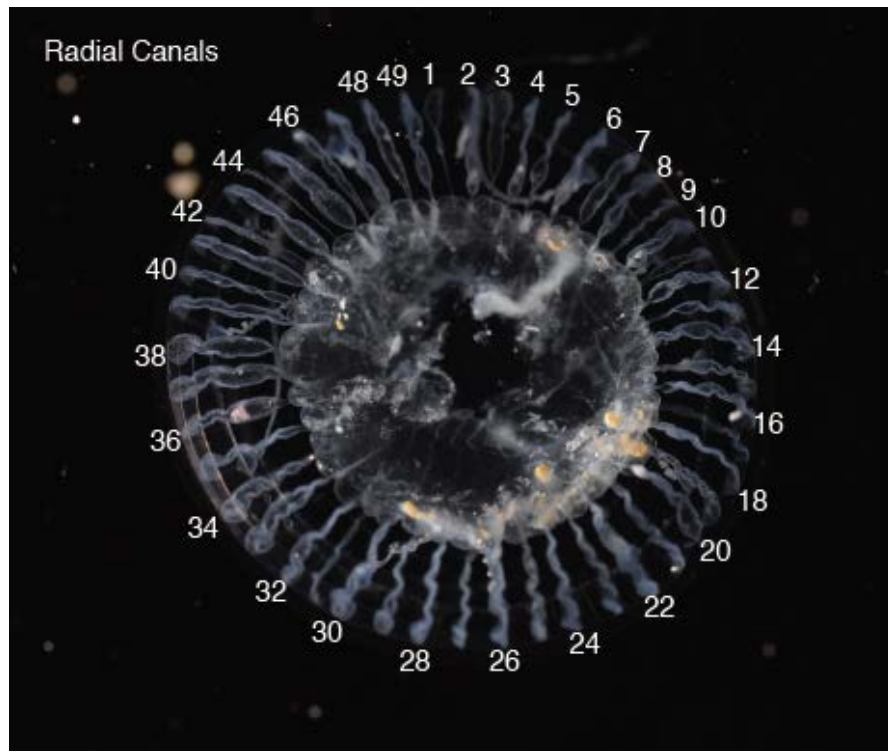

**Fig. M.** The specimen had 49 radial canals.

## Molecular identification

We investigated if several DNA barcode sequences, 18S, 16S, and COI, from this *Aequorea* specimen matched the sequences in publicly available databases. We used both a *de novo* assembly and a reference-based assembly to generate the barcode sequences for this specimen.

For the *de novo* assembly approach we used existing *Aequorea* 18S, 16S, and COI sequences as blastn queries against the transcriptome from the Queensland-collected *Aequorea* specimen. We used the following sequences as queries: *A. australis* 18S sequence [KF962202.1](#), *A. australis* 16S sequence [KF962390.1](#), and *A. macrodactyla* COI sequence [LK054491.1](#). The following orthologues were identified in the *de novo* assembled transcriptome:

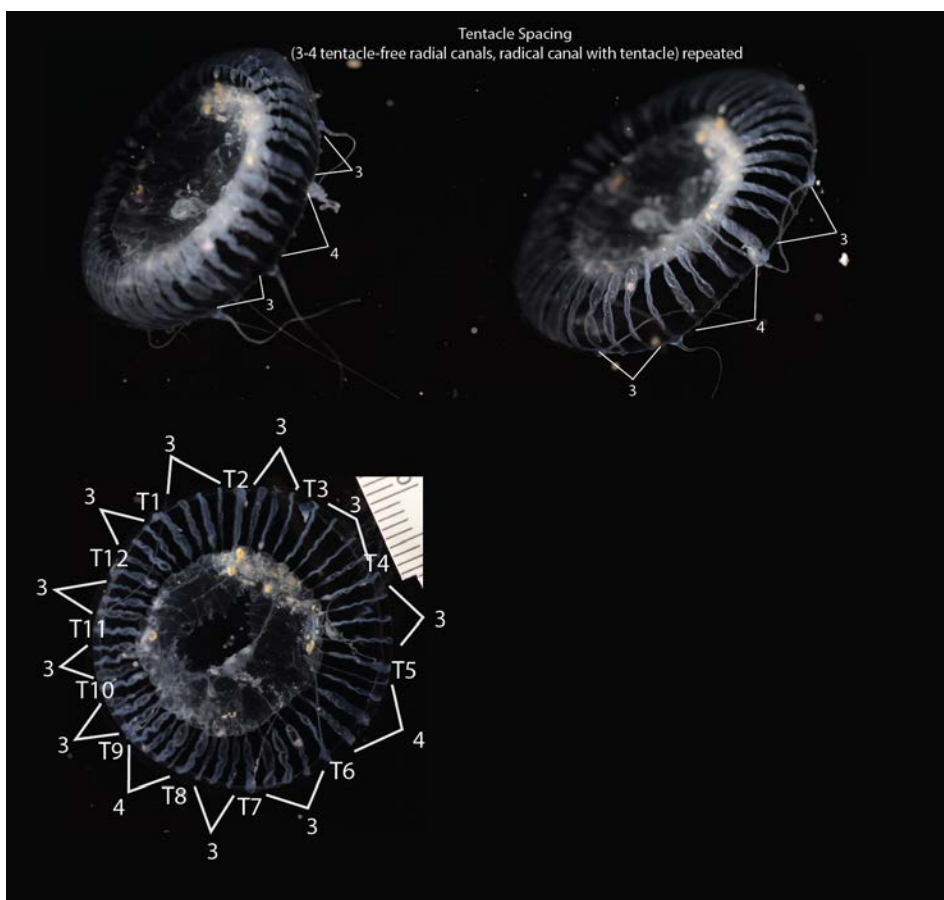

**Fig. N.** The specimen had 3-4 radial canals between each tentacle.

## 16S orthologues

```
>TRINITY_DN25108_c0_g1_i1
GTAAATTTTAAATTAAGGTAATTCGTTATAAGTGTGTAAGGCAGGTGGTGAGTTAAAAACCCATTCTAGAGTGTTAGAGGCTTTCAAAGCTTTTACTTAAATATAA
GAAATGGATTTTTGGTGTCTTATTCCTTTTCGTAATAAGACCCTTTAGGTTATTAACCTGTAGATAGAAACCTTCTGTCTTGGCAGCGGAATGAACTCAAATCATG
TAAGATTTTAAAGGTCGAACAGACCTACCTTTGATAACTTCTGCATTATCAGGACATCTTAATCAACATAGAGGTGACAAACTTCATTTTCGATAGGAACTCTAA
AATGAAATTTATCCTGTTATCCCTAAGGTAGCTTTTATTTATGATCGTTTTTCTTTTACTAAGTAAAAACGGGTCATTATAGCCATTTTAAATGATTGTTAAATG
TATTAATTTACAAATAAGTTAAATATTAACGTTGCTTACTTTTCGTTAAAATAGAAAGCAGTCGCCCCAACTAACTACCAACCTTTTTATTAAGTGAATCAGTTT
TCTTATTATATAAAAAGGTTATAGTTAAGCTCTATAGGGTCTTTTCGTCCTACAGTTTAAAATAGCATCTTAACTATTATTTCAATTTCTATTAATTTTTTCTAAG
ACAGTGGAATATTCGTTCAACCATTCACTATCCATCAATTAATGGCGAGTGATTATGCTACATTATCAGGTCAGGTTACCGCGTCTTTTAACTCTATTAC
TAAGACTTTACATTTTAAATTAAGATCACTGGCAGGTTACACCTTAGATTTTATCTAGGGCTATGTTTTGGTAAACAGTCGATATTTCTATTTTGGCCGAGTT
ACTTAGAAAAAAGCTCATTACTTTTTTATCCCTCTTGATTCAGAGTATACAGTCTACAATTTCTAATTTCTCGAGTATCTTAGATTTTATTTCTGTTAGATTGAA
AAGCTGTATAACCTTATTCATGGGTAAAAAAGAAAAATAGGAACAAAATTTAGTAATAATCGTACTTACATTATTTCTCCGTCAACTTACGAAATCTTTAACGG
AATACTCTACTACTTAAAAATTAGAATTACTGATGAAGAGTTTAACTAAATTTAAGGAGTAAATCTTTAATTAATAAACTATTACGTACTCTATAAAATGTGGC
AGTTTCTAAGCCCACTTCTTTGTTGTCATAATAACTAAGCTTTGGCTTTTACTTTCATAAAGTTATGATTTCTAATTAAGATTGTTATCTTTTAAACAAATAA
TGTTATAACTATTTGTTGACTATTAGAATAAATTTTACTGATATAAATTTTGAAGAGAACAGCTATATCCAAGTTCGATTGTTTTTCGCTGCTAAATGCA
AATCATCTAAGAAATTTTTCTACATTCAGTCTTCTTCAAAAAGCTTTTCAACAATTTAGACTTGGTTTTTCGGGAAATATAACTTAACTACTACTGAGCCATAAA
AGCTTGCTAATATTTCTTGTAAGTTTCAATATACAAAAGGTAATGATTTTCAATGTTTAACTCTAATCATTTGTTAAATTTCTTCAAGTACTCGTTTTATAG
GTAGATTTAGGTAGTATTTATGTAATAATCATGGTAATTAACATGGAAAAGATTTTCGTTCCCACTACTTTCTTTTTACTCTTATAGGTTACTAAGATGTTTCAGT
TCTTTTTTAACTTCAAGTTGAAAAATATTAAGTAATTTATTTATTTAATAATCACTAAACCTCTATAAATTTGATTAGATTTTTTA
>TRINITY_DN25108_c0_g2_i1
GTAAATTTTAAATTAAGGTAATTCGTTATAAGTGTGTAAGGCAGGTGGTGAGTTAAAAACCCATTCTAGAGTGTTAGAGGCTTTCAAAGCTTTTACTTAAATATAA
GAAATGGATTTTTGGTGTCTTATTCCTTTTCGTAATAAGACCCTTTAGGTTATTAACCTGTAGATAGAAACCTTCTGTCTTGGCAGCGGAATGAACTCAAATCATG
TAAGATTTTAAAGGTCGAACAGACCTACCTTTGATAACTTCTGCATTATCAGGACATCTTAATCAACATAGAGGTGACAAACTTCATTTTCGATAGGAACTCTAA
AATGAAATTTATCCTGTTATCCCTAAGGTAGCTTTTATTTATGATCGTTTTTCTTTTACTAAGTAAAAACGGGTCATTATAGCCATTTTAAATGATTGTTAAATG
TATTAATTTACAAATAAGTTAAATATTAACGTTGCTTACTTTTCGTTAAAATAGAAAGCAGTCGCCCCAACTAACTACCAACCTTTTTATTAAGTGAATCAGTTT
TCTTATTATATAAAAAGGTTATAGTTAAGCTCTATAGGGTCTTTTCGTCCTACAGTTTAAAATAGCATCTTAACTATTATTTCAATTTCTATTAATTTTTTCTAAG
ACAGTGGAATATTCGTTCAACCATTCACTATCCATCAATTAATGGCGAGTGATTATGCTACATTATCAGGTCAGGTTACCGCGTCTTTTAACTCTATTAC
TAAGACTTTACATTTTAAATTAAGATCACTGGCAGGTTACACCTTAGATTTTATCTAGGGCTATGTTTTGGTAAACAGTCGATATTTCTATTTTGGCCGAGTT
ACTTAGAAAAAAGCTCATTACTTTTTTATCCCTCTTGATTCAGAGTATACAGTCTACAATTTCTAATTTCTCGAGTATCTTAGATTTATTTCTGTTAG
```

## 18S orthologues

```
>TRINITY_DN1762_c0_g1_i1
GAACGAAAGTCGGAGGTTCTGAAGACGATCAGATACCGTCGTAGTTCGCCACATAAACGATGCCGACCGGGCGATGCCGGCGGCTTATCCCATGACCCGCCGGGCAG
CTTCCGGGAAACCAAAGTCTTTGGTTCCGGGGGAGTATGGTCGCAAGGCTGAAACTTAAAGGAATTGACGGAAGGGCACACCAGGAGTGAGCCTGTGGC
>TRINITY_DN24861_c0_g1_i2
ACAAGAAATAACGATACGGGGTCTTTACAGGTCTCGCAATTGGAATGAGTACAATTTAAATCCTTAACTGTATATAACCGATATTGACTTGACATACATTGACTT
GACTGACATTGACTGTACATGTCTCACGTTGACTGTACATAACTGACTTTCACTGTACATAACTGACGTTGACTGTACATGACTGACATTGACTGTACATGACTGA
TATTACTTGTACTTGGCACAAATTGACTTACTACTAATTTACATGACTGACGTTGACAGTACATGTCTCACATTGACTGTACATAACTGACTTTCACTGTAC
ATAACTGACGTTGACTGTACATGACTGACATTGACTGTACATGACTGATATT
>TRINITY_DN45236_c1_g1_i1
GATTAAGCCATGCATGTCTAAGTACAAGCCCTTGTACGGTGAACCTGCGAATGGCTCAATAAATCGGTTTTAAGACACTTGATAGTCTCTCTACTTGGATAACCGT
AGCAATTCATAGAGTAAATACATCCGCTATCCTTCGGGTGAGCTTATTAGATCCAACCACAACCGTGGTGAGTCATAGTAATCAATCTGATTGGCGCAAGCCGACGGTT
CAATCTCGATTCCGCCCTATCAGCTTTCGACGGTAGGGTATTGGCTACCGTGGCGTTAACGGGTAACGGAGAATTAGGGTTCGATTCCGGAGAGGGAGCCTGAGA
AACGGCTACCACATCCAAGGAAGGCAGCAGGCGCTAAATTAACCAATCTAAAGCAGGGAGGTAGTGACAATAAATACTGACGCCGGATTCAATGAATCTGGTAA
AGAATGAGAACAGTCTAAACCCCTTATCGAGGACCCATTGGAGGGCAAGTCTGGTGC
>TRINITY_DN45236_c1_g2_i3
GCGTTGAGGCTATACTACTACTACTACAGTATGTTTTGTACGAATAGTTACCTGGTTGATCCTGCCAGTAGTCATATGCTTGTCTCAAAGATTAAGCCATGCATG
TGTAAGTATAAGCTGTATGTACTGTGAAACTGCGAATGGCTCATTAATCAGTTATCGTTTTATTGATTGTACTTACCATTAGATGGATATCTGTGGTAATTCTAG
AGCTAATACATGCGAAAAGTCTGACTCTTCGGGGAAGGGATGTATTTATTAGATTAATAACCAATGCTCATCTCGGTGGGCTTATAGTGGTGATTCATGATAACTT
TTCGAATCGTATAGGTTAAACCCGACGATGTTTCATTCAAATTTCTGCCCTATCAACTGTCGATGGTAAAGGTAGTGGCTTACCATTGGTTGTAACGGGTGACGGAGA
ATTAGGGTTCGATTCCGGAGAGGGAGCCTGAGAAACGGCTACCACATCTAAGGAAGGCAGCAGGCGGGAATTAACCAATCCCGACTCGGGGAGGTAGTGACAAG
AAATAACGATACGGGGTCTTTACAGGTCTCGCAATTGGAATGAGTACAATTTAAATCCTTAAACGAGGATCCATTGGAGGGCAAGTCTGGTGCCAGCAGCCGCGT
AATTCAGCTCCAATAGCGTATATAAAGTTGTTGCAAGTAAAAAGCTCGTAGTTGGATTTCGGACTGGTGGCTGGTGGTCTGCCGCAAGGTGTGTTACTGACTC
TGCTGTCTTCTTCCAGAGTCTGCTACTTAACCTGTCGAGTATTTTGGAAATTTGAGACGTTTACTTTGAAAAAATTAGATGTTCAAAGCAGGCTATTT
ATTGCCGGAATACATGAGCATGGAATAATGGAATAGGACTGCGGCTTATTTTGTGGTTCTGAGACCATAGTAATGATTAAGAGGGACAATTGGGGGCATCCGT
ATTTCTGTTGTCAGAGGTGAAATTTCTGGATTTACGAAAGACGAACAACCTGCGAAAGCATTTCGCAAGAGTGTTCATTAATCAAGAACGAAAGTTAGAGGATCGA
AGACGATCAGATACCGTCTAGTTCTAACCATAAACGATGTGCACTAGGGATCGCGGGCGTTAAATTTTAAAGATGACTCCGGCGGCACCTTACGGGAAACCAA
GTCTTTGGATTCCGGGGGAAGTATGGTTGCAAACTGAACTTAAAGGAATTGACGGAAGGGCACACCAGGAGTGAGGCTGCGGCTTAATTTGACCAACACGG
GAAAACCTACCAGGT
>TRINITY_DN45236_c1_g2_i4
GATTAAGCCATGCATGTCTAAGTACAAGCCCTTGTACGGTGAACCTGCGAATGGCTCAATAAATCGGTTTTAAGACACTTGATAGTCTCTCTACTTGGATAACCGT
AGCAATTCATAGAGTAAATACATCCGCTATCCTTCGGGTGAGCTTATTAGATCCAACCACAACCGTGGTGAGTCATAGTAATCAATCTGATTGGCGCAAGCCGACGGTT
CAATCTCGATTCCGCCCTATCAGCTTTCGACGGTAGGGTATTGGCTACCGTGGCGTTAACGGGTAACGGAGAATTAGGGTTCGATTCCGGAGAGGGAGCCTGAGA
AACGGCTACCACATCCAAGGAAGGCAGCAGGCGCG
>TRINITY_DN45236_c1_g2_i7
GCACCACCAGGAGTGGAGCTGCTGCTTAATTTGACTCAACACGGGAAAACCTACCAGGTCCAGACATAGTAAGGATTGACAGGTTGAGAGCCCTTTCTTGATTCT
ATGGTGGTGGTGCATGGCTTCTTAGTTGGTGGAGTATTTGCTGGTTAATTCGGTTAACGAACGAGACCTTGACCGGCTAAATAGTCGGGAGTTTTTGAAC
TGCTCAAT
>TRINITY_DN45236_c1_g3_i1
CCATGGTTGTAACGGGTGACGGATAATTAGGGTTCGATTCCGGAGAGGGAGCCTGAGAAACGGCTACCACATCCAAGGAAGGCAGCAGGCGCTAAATTAACCAAT
CCTAAAGCAGGGAGGTAGTGACAATAAATACTGACCGGATTCAATGAATCTGGTAAAGAATGAGAACAGTCTAAACCCCTTATCGAGGACCCATTGGAGGGCAA
GTCTGGTGC
>TRINITY_DN55608_c0_g1_i1
GCCAGTACTCATATCCTTCTCTCAAACATTAACCCATGCATGTCTAAGAATAAGCTGTATGTACTGTGAAACTGCGAATGGCTCATTAATCAGTTATAGTTTGT
TGTAAGTACTGCTACTCGGATAACCGTAGTAATCTAGAGCTAATACGTGCAACAAACCCGACTTCTGGAAGGGATGCATTTATTAGATAAAAAGCCGGCGCG
GCTTGCCCGCTCTCCGGTGAATCATGGTAACTCGACGGATCGCACGGCTG
```

## COI orthologues

No orthologous sequences were identified in the *de novo* assembled transcriptome.

For the reference-based assembly we mapped untrimmed RNA-seq reads to the KF962202.1, KF962390.1, and LK054491.1 sequences using BWA-MEM [17] in unpaired mode. The resulting bam files were used to correct the reference using pilon unpaired mode [18] This same correction strategy was repeated on the output of pilon. The output fasta of the second round of pilon correction was confirmed to be completely converted to the sequence of the Australia-collected *Aequorea* specimen by visual inspection in IGV [19].

## Phylogenetic analysis

The phylogenetic position of the Australia-collected *Aequorea* specimen was determined using the 16S and COI sequences collected from the transcriptome and the reference-guided assembly using a Bayesian tree. *Aequorea* sp. COI, 18S, and 16S sequences were downloaded from NCBI. ClustalW 2.1 inside Geneious as used to align each locus independently (Cost matrix: IUB, Gap open cost: 10, Gap extend

cost: 6.66, Free end gaps) [20,21] Specific sequences can be found in supplemental materials. Alignments were trimmed such that no sequence lacked 5' or 3' sequence. The 18S dataset contained mostly *A. australis* sequences and lacked a significant overlapping region, so we did not proceed with creation of a Bayesian tree.

We produced one Bayesian tree each for COI and 18S using MrBayes [22]. For the 16S tree we used a total chain length of 10000 with four simultaneous chains, a burn-in length of 1000, the HKY85 substitution model with gamma rate variation and a random seed [23]. The COI tree shared the same parameters except it used a chain length of 100000 and a burn-in length of 10000. The COI tree used *Nematostella vectensis* COI MH087700.1 as the outgroup, and the 16S tree used *N. vectensis* 16S AY169370.1 as the outgroup (**S1 Fig** and **S2 Fig**).

The COI tree shows that the reference-corrected COI sequence (sample\_COI) is sister to a large *A. australis* clade. It is important to note that the sample's COI sequence is *bona fide*, even though it was generated using reference-guided assembly. Therefore, the sequence coming out as sister to *A. australis* indicates true relation. The 16S tree is inconclusive as to the phylogenetic position of both the transcriptomic 16S sequences and the reference-guided assembly 16S sequence. Several species are monophyletic in this tree and *A. australis* is in a large polytomy.

Taken together, the phylogenetic position of the *Aequorea* individual collected near Heron island is unknown, although it shares a similar mitochondrial COI sequence with *A. australis*. As the morphology of the collected individual does not match that of *A. australis* it is possible that there is gene flow between multiple species in the area, causing a *A. macrodactyla* specimen to have an *A. australis* mitochondrial haplotype.

## AvicFP4 assembly

From the initial *A. victoria* transcriptome assembly we found a transcript that contained a partial GFP open reading frame (ORF).

```
>Av_All_Trinity_TRINITY_DN49895_c4_g3_i2_partial_AvicFP4
ATGGACAGTGGAGCACTTCTTTTCAAGCAAAAAATCCCACCTGTAGTAGAGTTTGAAGGTGATGTCGAGGGAATGAAATTTTCTG
TCAGAGGAAAAGGCCATGGGGATGCAACCAATGGAAGAATTGAAGCCAGCTTTATCTGCACAACCTGGAGAATTGCCAGTACCATG
GTCGAGCATTATCAGTAGTCTAACATATGGTTTTCTCTGCTTTACAAAATATCCAGATGGTATCAAAGACTTCCCTAAAAAGTGCC
ATGCCAGAAGGATACGTCCAAGAGCGAAAAGATTTCTTTTGAAAAATGACGGTACATACAAAAACACGTGCTGAAGTGACGTTTGAAA
ATGGGTCGGTGTACAATAGAGTCAAGTTGAATGGTGAAGGATTTAACAAAAGGTGGAAAATATCTTAGGAAAAAAAATTGGAATACTC
CTTCAATCCACACTGTATCTACGTTCTTGGAGATAAAAGAAAAACAATGGCATTAGATGCTGCTTTAATGTTGTTTCATAACATTGTT
GGAGGAGGTCAGCTGATTGCCAGCCATAGTCAATTGAATACTCCACTCGGTGGAGGTCCGATAGCTATTCCAGAATACCATCACA
TATGTAACCACACAACACTCAGTAAAGATCCAAGAGAACCACGAGATCACATGACCGTCGC
```

To determine if the partial GFP was a true transcript or not we mapped the RNA-seq reads from the mouth, body (2x libraries), and bell. In total 320 read pairs across the four RNA-seq libraries mapped to this locus. The read depth was drastically inconsistent across the transcript suggesting a misassembly, such as the abrupt increase in coverage around 260 bp, and the lack of 3' coverage (**Fig. O**).

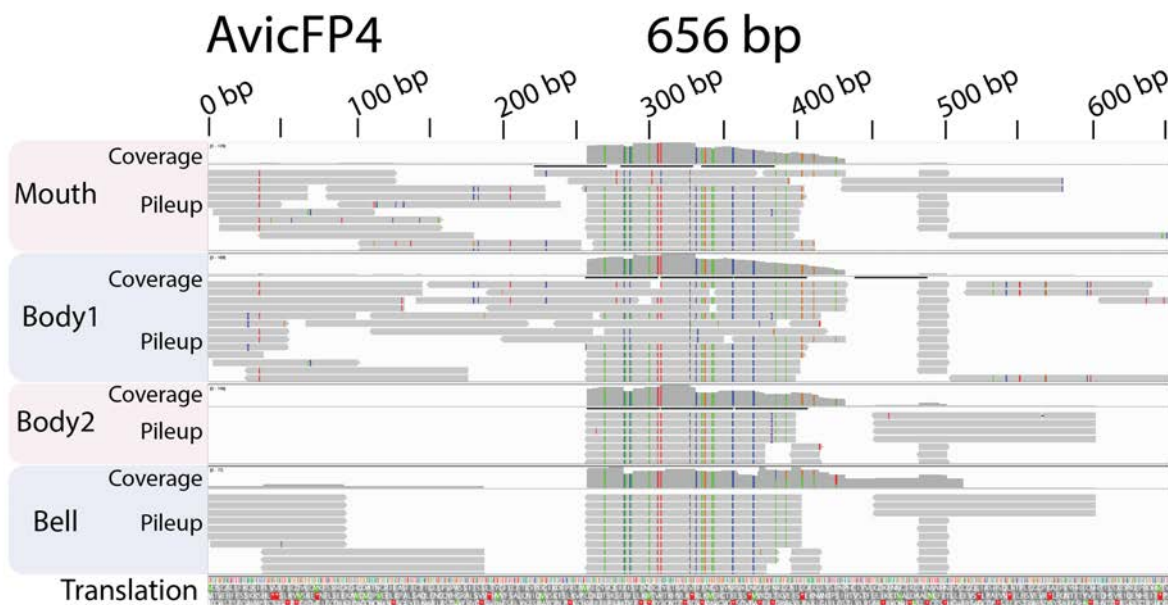

**Fig O.** Reads mapped to the partial *A. victoria* GFP transcript. RNA-seq reads mapped to the partial GFP transcript using BWA-MEM and visualized with IGV. The top track is the mouth RNA-seq library. The middle two tracks are the body RNA-seq libraries, and the bottom track is the bell RNA-seq library. The data underlying this figure may be found in SRA SRR9606756 through SRR9606760.

To attempt to recover a correctly assembled transcript for the partial GFP we used the 320 read pairs mapping to this locus as the input for a *de novo* assembly using the Geneious assembler v11.1.5. One contig contained a complete avGFP homolog ORF. We then mapped all four *A. victoria* RNA-seq libraries to this contig using BWA-MEM to verify it was a real transcript. The transcript was only present in one of the body libraries, and at very low copy number (**Fig. P**). After verifying that the protein encoded by this transcript produced a functional FP, we called this transcript AvicFP4. This transcript appears to represent two alleles that differ by one conservative amino acid substitution (Asp to Glu), both of which have nearly identical optical properties. For simplicity, we report here the optical properties of only one of these alleles and include only one in the sequence alignment in **Fig. A**.

```
>AvicFP4_complete_transcript
GGAAATCATAAGCGAGACAAGATCATTGTTTTTAATTAATGTTAATTTAAAAGGACCATAATTGAAAAAATTATTAGGGGGCCCC
TAGCCCCCTGGCTCCGTGGTCCCTGGATTGGTATAAGTACGGCAGAATTTCTATTCGTAAATCCAGCATCAAGAGAACGCACAG
AGCACAGAACATCGAAACCATATATTTACAACAACTTGAAAAAAAAGATTTTCAAACATGGACAGTGGAGCACTTCTTTTCAAG
CAAAAAATCCCACTTGTAGTAGAGTTGAAGGTGATGTCGAGGGAATGAAATTTTCTGTCAGAGGAAAAGGCCATGGGGATGCAA
CCAATGGAAGAATTGAAGCCAGCTTTATCTGCACAACCTGGAGAATTGCCAGTACCATGGTCGAGCATTATCAGTAGTCTAACATA
TGGTTTTCTYTGCTTTACAAAATATCCAGATGGYATCAAAGACTTCCCTAAAAGTGCCATGCCAGAAGGATACGTCCAAGAKCGA
ACGATCTCTTTTTGAAAATGACGGTACATACAAAACACGTGCTGAAGTGACGTTTTGAAAATGGGTCGGTGTACAATAGAGTCAAGT
TGAATGGTGAAGGATTTAACAAAAGGTGGAAATATCTTAGGAAAAAATTTGGAATACTCCTTCAATCCACACTGTATCTACGTTCT
TGGAGATAAAAGAAAACAATGGCATTAGATGCTGCTTTAATGTTGTTTCATAACATTGTTGGAGGAGGTCAGCTGATTGCCAGCCAT
AGTCAATTGAATACTCCACTCGGTGGAGGTCCGATAGCTATTCAGAATACCATCACATATGTAACCACACAACACTCAGTAAAG
ATCCAAGAGAACCACGAGATCACATGACCGTCGAGAAGTGTGAAAGGCTGTCGATTGCAAGACTGCTTATTTATAGTTCATCAG
ATTTTTTGATGATGTTTTTTCAAGTTTTTGTATTTTAAACATTGCTGCCG
```

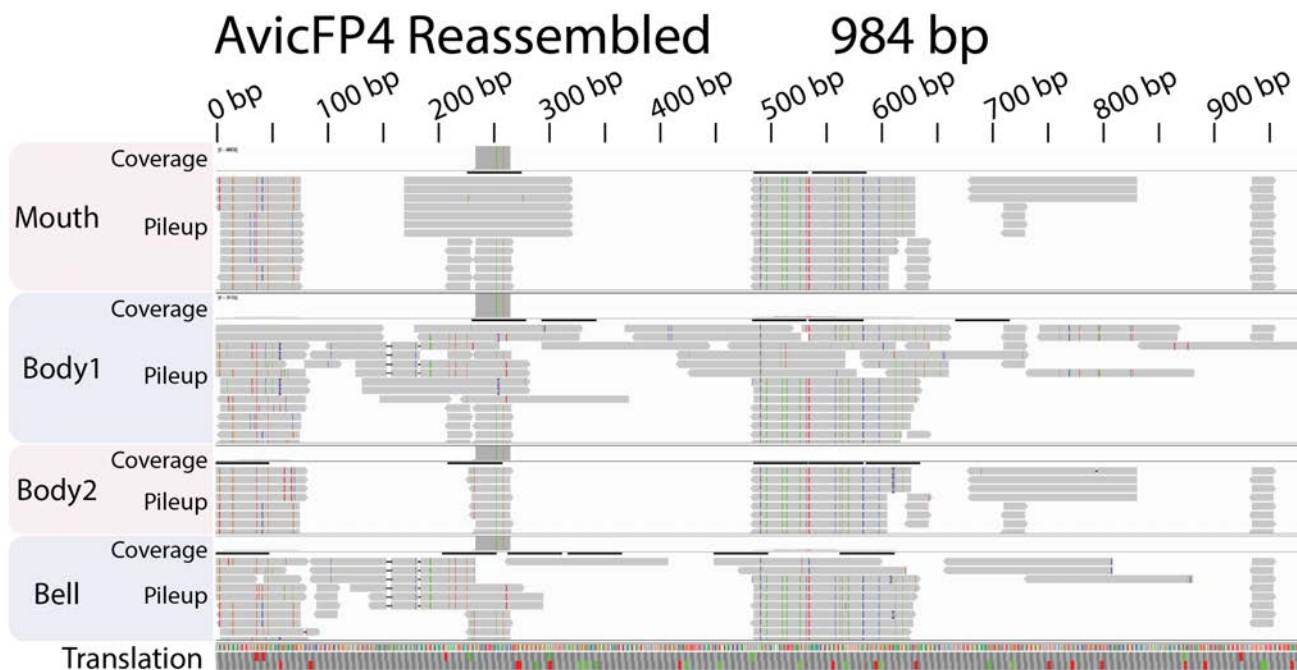

**Fig P.** Reads mapped to the *A. victoria* AvicFP4 complete transcript. RNA-seq reads mapped to the partial GFP transcript using BWA-MEM and visualized with IGV. The complete ORF was only expressed in one of the body RNA-seq libraries. The data underlying this figure may be found in SRA SRR9606756 through SRR9606760.

## Verifying Newly Identified Transcripts

To determine if the remaining newly assembled FP-encoding transcripts from *A. victoria* and *A. cf. australis* were *bona fide*, we mapped the RNA-seq reads from each species to their respective transcripts using BWA-MEM. Transcripts AvicFP1, AvicFP2, AvicFP3, AausFP1, AausFP2, AausFP3, and AausFP4 all had continuous read coverage, even in low-copy transcripts. This suggests that all of these transcripts are truly present in the animals (**Fig. Q** through **Fig. W**).

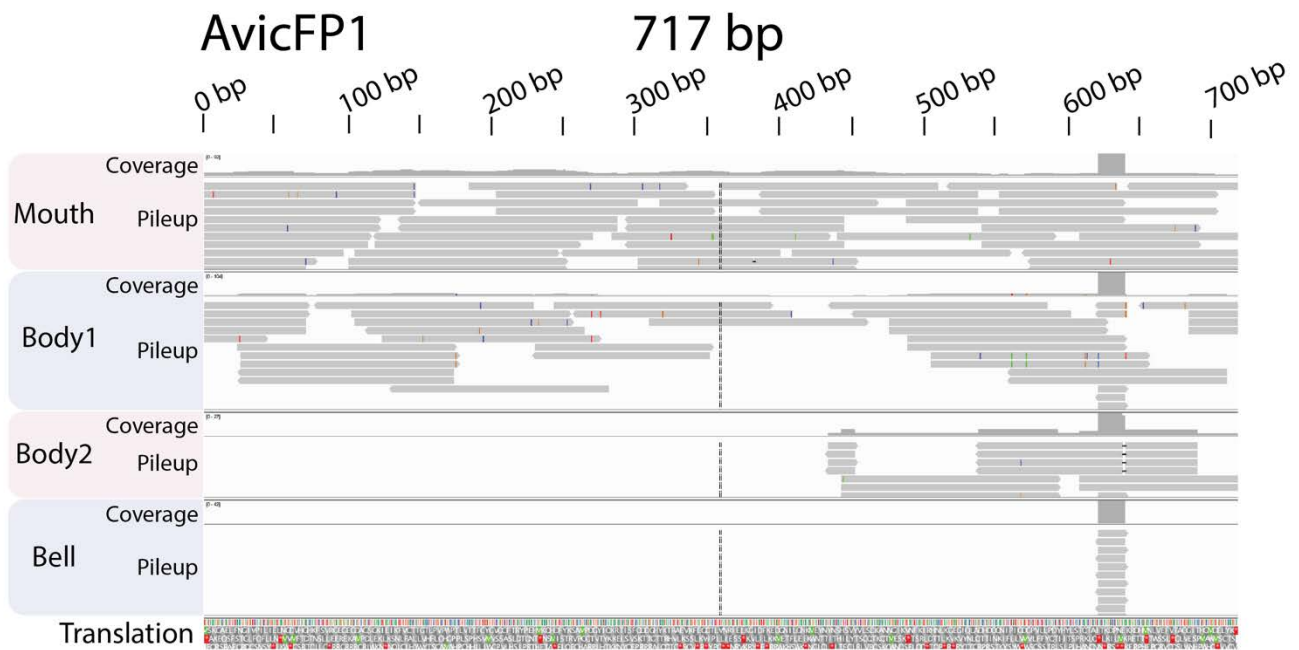

**Fig. Q:** Reads mapped to the *A. victoria* AvicFP1 complete transcript. The data underlying this figure may be found in SRA SRR9606756 through SRR9606760.

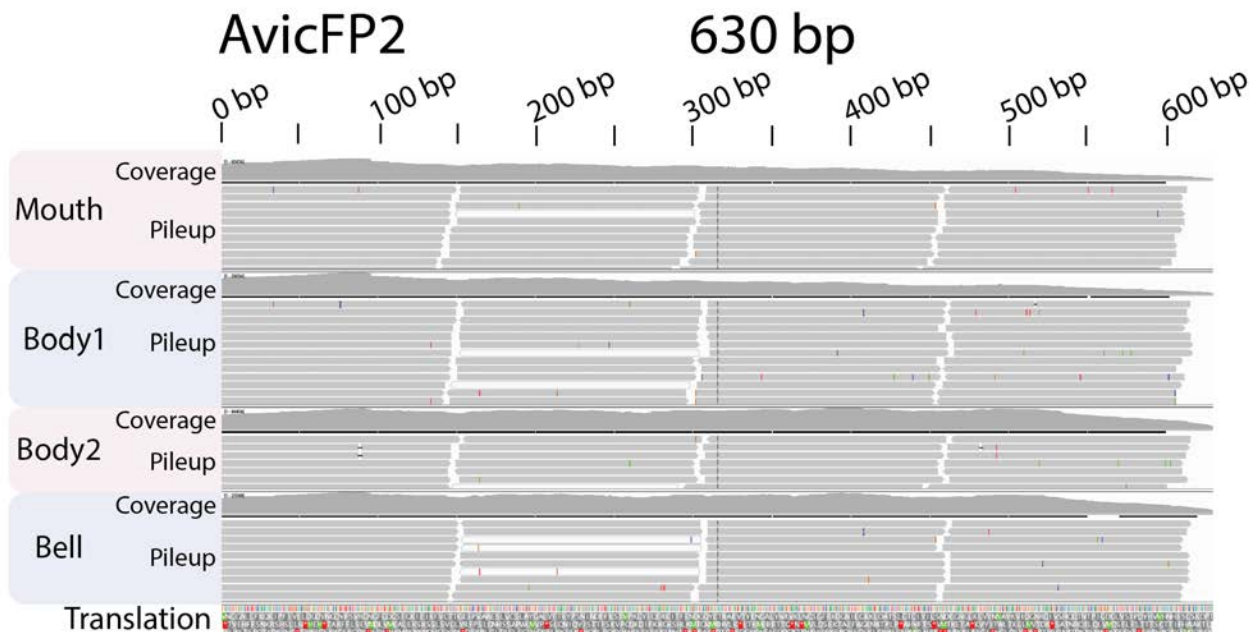

**Fig. R:** Reads mapped to the *A. victoria* AvicFP2 complete transcript. The data underlying this figure may be found in SRA SRR9606756 through SRR9606760.



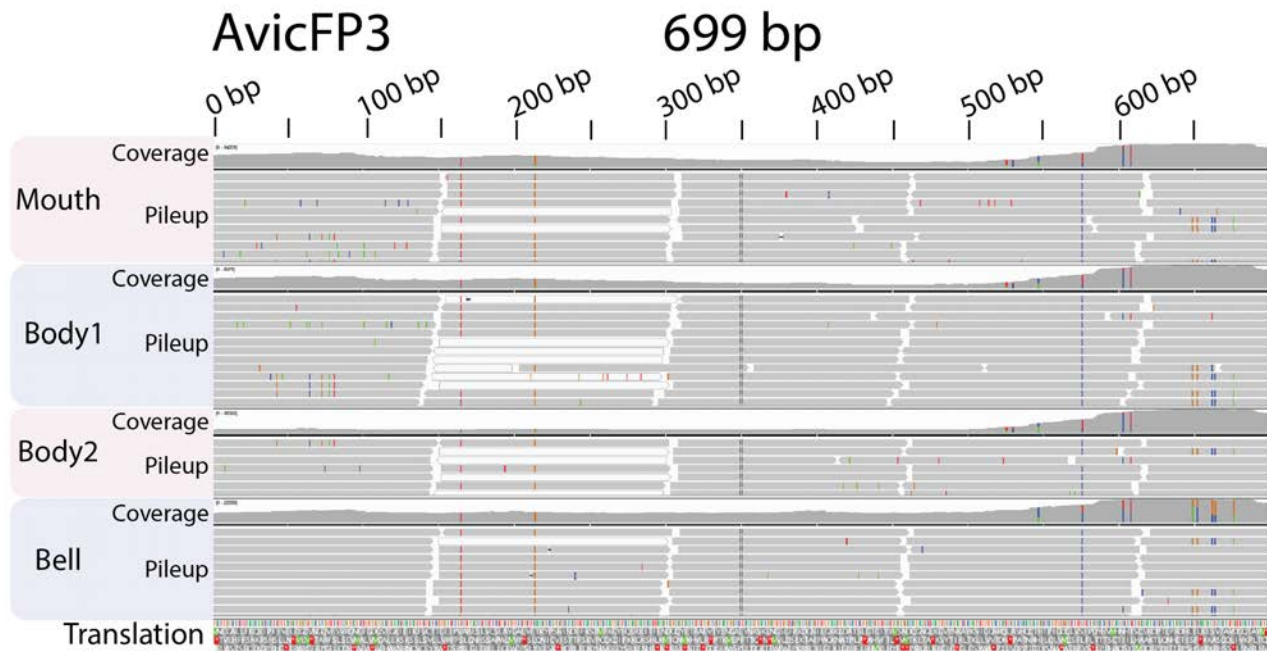

**Fig. S.** Reads mapped to the *A. victoria* AvicFP3 complete transcript. The data underlying this figure may be found in SRA SRR9606756 through SRR9606760.

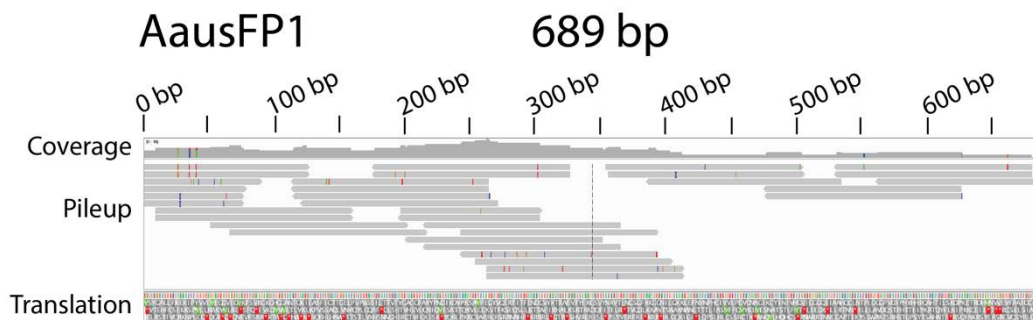

**Fig. T.** Reads mapped to the *A. cf. australis* AausFP1 complete transcript. The data underlying this figure may be found in SRA SRR9606756 through SRR9606760.

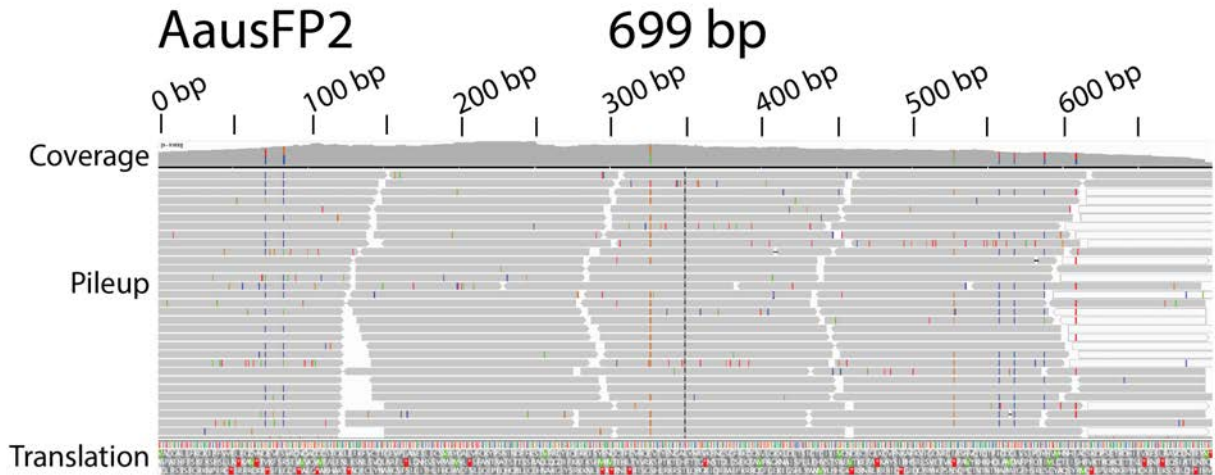

**Fig. U.** Reads mapped to the *A. cf australis* AausFP2 complete transcript. The data underlying this figure may be found in SRA SRR9606756 through SRR9606760.

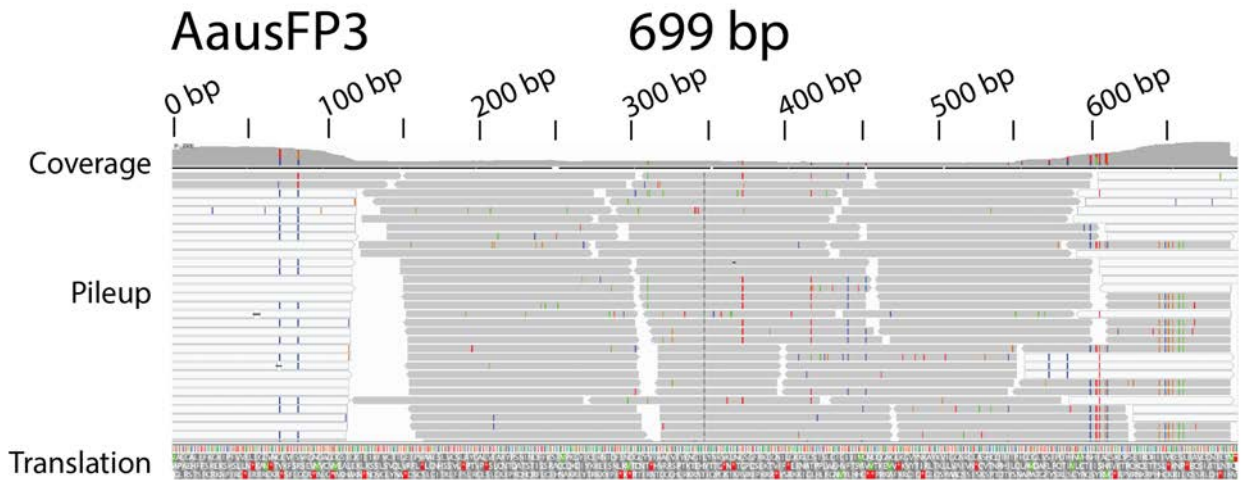

**Fig. V.** Reads mapped to the *A. cf australis* AausFP3 complete transcript. The data underlying this figure may be found in SRA SRR9606756 through SRR9606760.

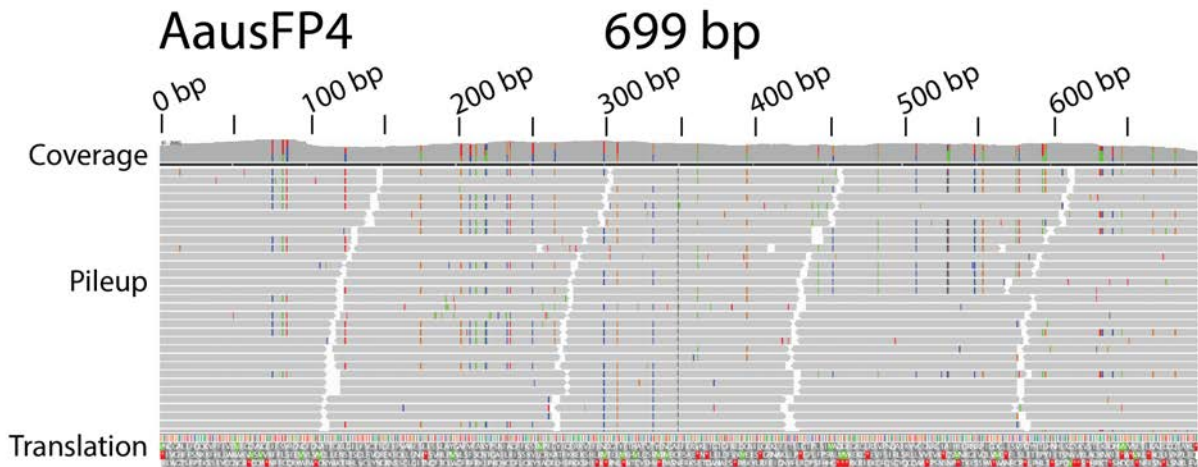

**Fig. W.** Reads mapped to the *A. cf australis* AausFP4 complete transcript. The data underlying this figure may be found in SRA SRR9606756 through SRR9606760.

## Expression and Characterization in Mammalian Cells

To further characterize the most promising FPs discovered in this study, we constructed mammalian expression plasmids encoding AausFP1 and mAvicFP1 alone and fused to human histone 2B (H2B), along with identical constructs containing mEGFP (EGFP A206K, which has been reported to have identical photophysical properties to EGFP but is monomeric [8]). U2-OS cells (human osteosarcoma) transfected with these plasmids displayed easily visualized fluorescence under the microscope. mAvicFP1 was partitioned evenly between nucleus and cytoplasm, as was mEGFP. AausFP1, in contrast, appears to be fully excluded from the nucleus, and sometimes displays brighter “aggregates” in highly-expressing cells (**Fig. X**).

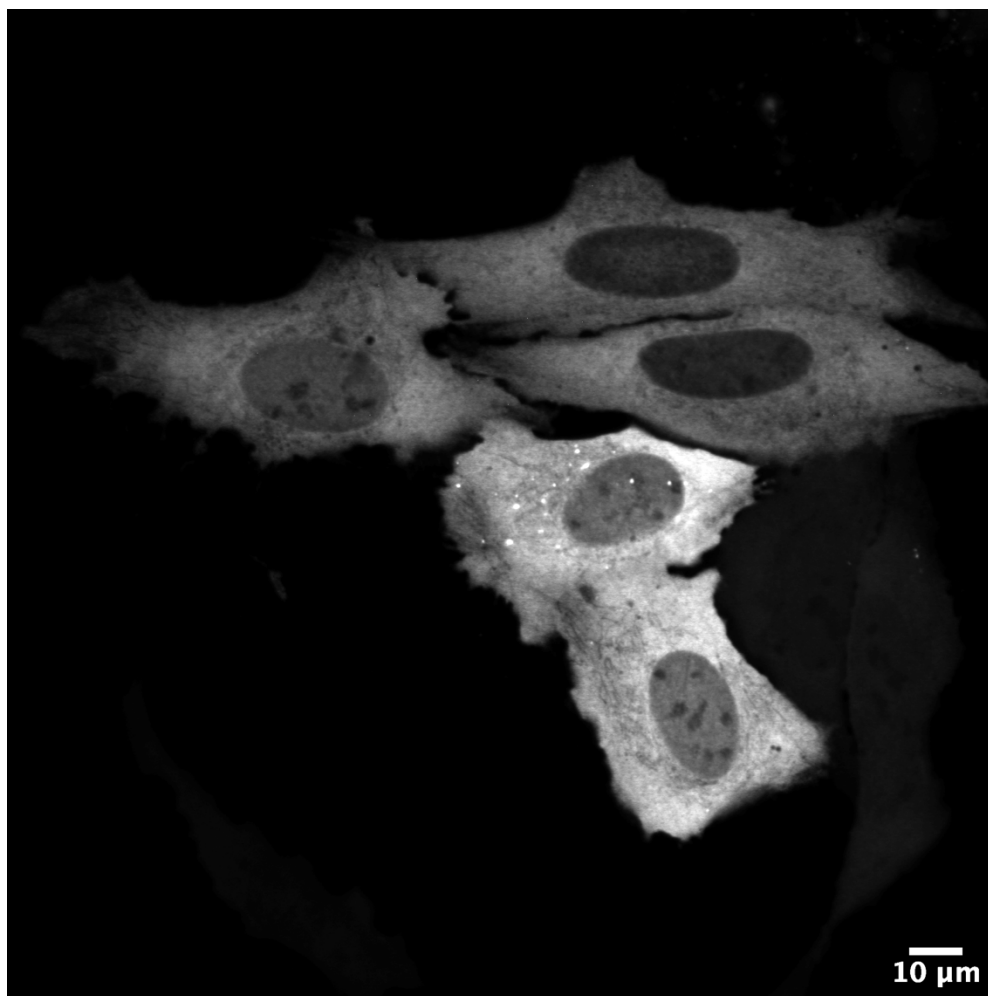

**Figure X.** U2-OS cells expressing AausFP1, illustrating exclusion from the nucleus and small bright aggregates in some highly-expressing cells.

**Cell Division Assay.** To determine whether mAvicFP1 displayed deleterious effects on cells when expressed as a fusion to a critical protein, we measured the cell cycle interval of cells expressing H2B fusions to mAvicFP1 and mEGFP by imaging a large field of cells every minute for >72 hours while incubating at 37°C and 5% CO<sub>2</sub>. To our knowledge, this particular way of examining FP toxicity has not been reported previously, but we chose this method because it represents a true imaging experiment, rather than simply measuring the toxicity of the protein on its own. By assaying through imaging, we have recreated conditions more similar to those of the end user of the FPs and can therefore capture the effects of light-induced toxicity (phototoxicity) in addition to more generic light-independent FP “toxicity.”

Cells were transfected approximately 24 hours prior to imaging. Immediately prior to imaging, the cells were stained with the far-red DNA dye SiR-Hoechst (Cytoskeleton, Inc.) such that we could image DNA of both transfected (H2B-FP) and non-transfected cells. For each of the two FPs, 12 cells that completed at least two divisions while expressing fluorescent H2B were selected for analysis, along with 12 non-expressing cells within two cell lengths of a transfected cell. Cells were chosen in this manner to ensure the fairest possible comparison between expressing and non-expressing cells in the same field of view. The cell cycle interval was defined as the time between visible chromosome separation events during mitosis, as visualized in either the green or far-red (control) channel. Because we measured the interval between division of each original cell and division of its daughter cells, we measured a total of 24 cell cycle intervals for both experimental and control cells for both mAvicFP1 and mEGFP H2B fusions (Fig. Y).

Contrary to our expectations, we found that H2B-mEGFP expressing U2-OS cells in this assay had a slightly longer cell cycle interval than control cells. Cell expressing H2B-mAvicFP1, however, had cell cycle intervals no different than the non-transfected control cells. Because the rate of cell division is likely to be sensitive to other factors, such as the cell density at a particular place on the coverslip, we do not feel that it is necessarily appropriate to conclude that H2B-mEGFP is toxic to cells. We do conclude, however, that we see no evidence in this assay of toxic or deleterious effects of moderate expression of H2B-mAvicFP1 in cultured cells.

**Photostability Measurements.** To assay the photostability of AausFP1 and mAvicFP1 and compare it to that of mEGFP, we expressed each of these FPs without a fusion tag in U2-OS cells (see **Methods** in main text). In general, we measure photostability using H2B fusions to anchor the FPs to a relatively slowly moving structure, which prevents diffusion of FP molecules in and out of the focal plane and gives the most accurate measure of photostability in live cells. Unfortunately, likely because AausFP1 is at least a dimer when expressed in cells, the fusion to H2B does not localize correctly and appears to be very toxic to cells. Because we felt that unhealthy cells might produce aberrant photobleaching curves, we chose instead to simply compare photobleaching curves of the cytosolic portion of untagged FPs. U2-OS cells are very flat, and so we also felt that diffusion of FPs in and out of the focal plane was unlikely to have a very large effect.

We found that on both widefield and laser scanning confocal microscopes, the raw photobleaching curve half-times were very similar for all three FPs under identical illumination conditions, despite dramatic differences in their excitation spectra. As discussed briefly in the **Methods** section of the main text, photobleaching half-times were then scaled by a correction factor that corresponds to the per-molecule brightness of each FP under the specific illumination condition. This factor accounts for the experimental simplicity of using the same illumination intensity for all proteins, even though the light output per molecule depends on the absorbance and quantum yield of the FP at the wavelengths used for excitation. For confocal bleaching, the correction factor corresponds to the molar extinction coefficient at 488nm multiplied by the quantum yield of the FP. For widefield, the correction factor depends on both the absorbance spectrum of the FP and the illumination spectrum at the objective:

$$\phi \int I(\lambda) \cdot A(\lambda) d\lambda$$

where  $\phi$  is the quantum yield,  $I(\lambda)$  is the illumination intensity,  $A(\lambda)$  is the absorbance of the FP. In both cases, *the correction factor normalizes the photobleaching half-times to those that would be observed if the excitation were tuned to produce equal photon output per FP molecule at time zero.*

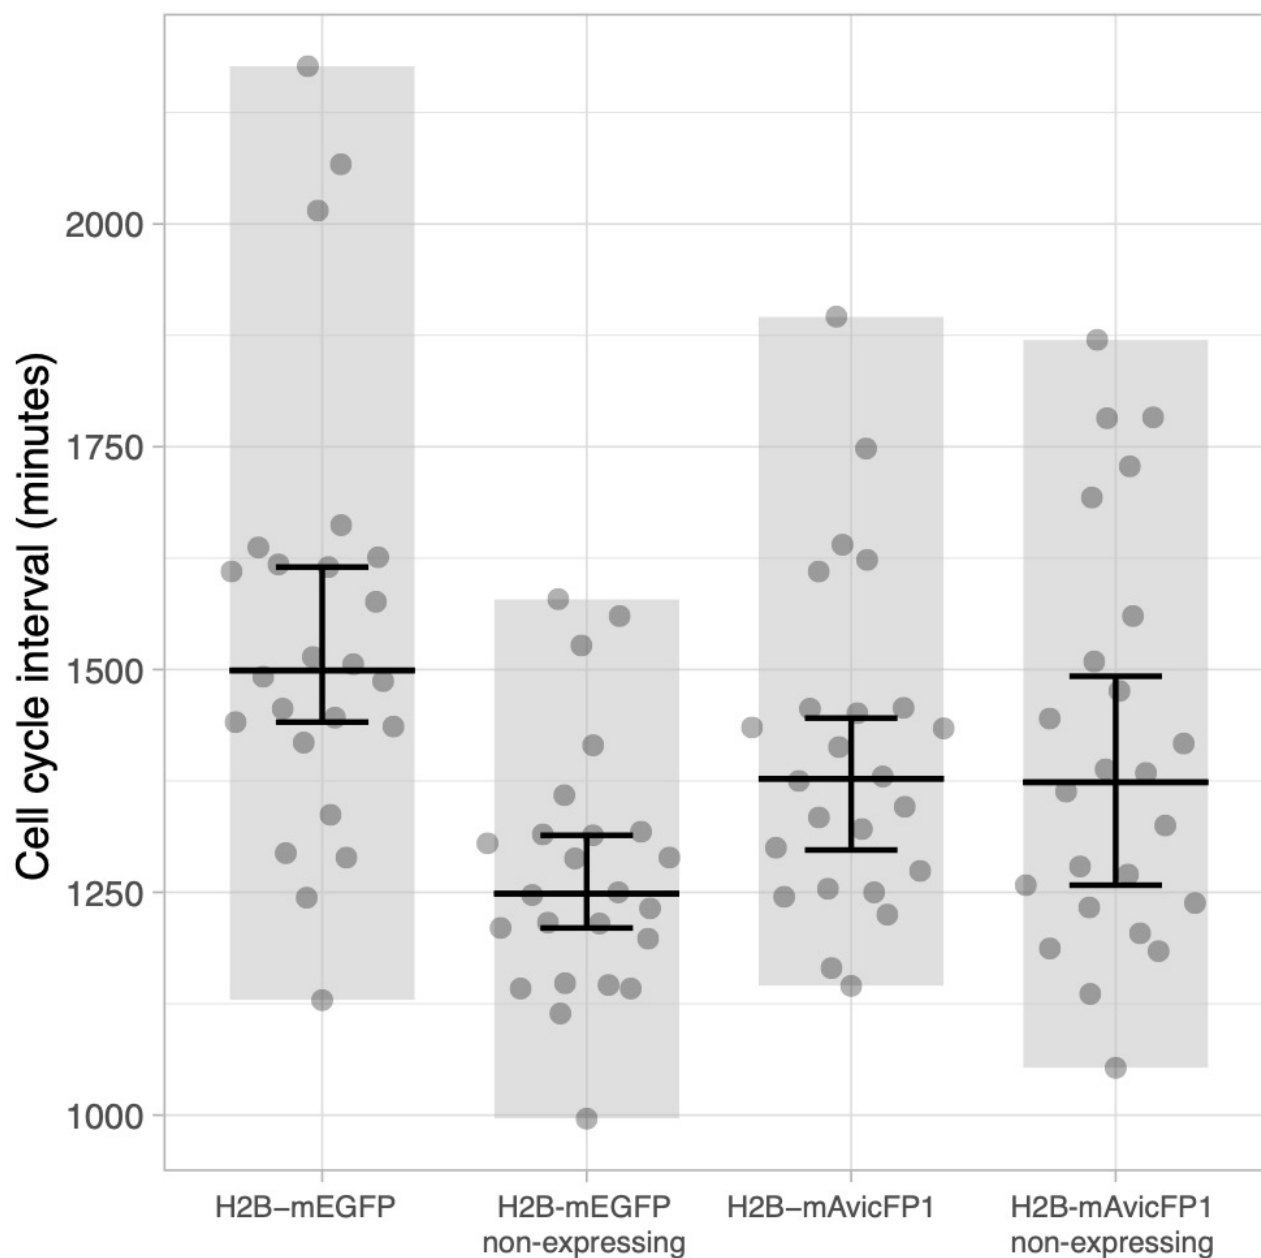

**Fig. Y.** Cell cycle intervals for U2-OS cells expressing H2B-mEGFP or H2B-mAvcFP1, with non-expressing control cells from the same imaging field. The data underlying this figure may be found in **S1 Data**.

After applying correction factors to the measured photobleaching half-times, we found that AausFP1 and mAvcFP1 both have higher photostability than mEGFP (**Figs. Z** and **AA**). We also noted that with widefield illumination, mEGFP-expressing cells were much more variable in their bleaching rates than those expressing AausFP1 or mAvcFP1, even though all cells were imaged on the same day. Specifically, the rate of mEGFP bleaching appeared to have a very rough inverse correlation with expression level, something that we also did not observe for AausFP1 or mAvcFP1. Despite the high variability, removing outliers led to only a tiny change in the mean and median photobleaching half-time values for mEGFP, and our conclusions remain unchanged.

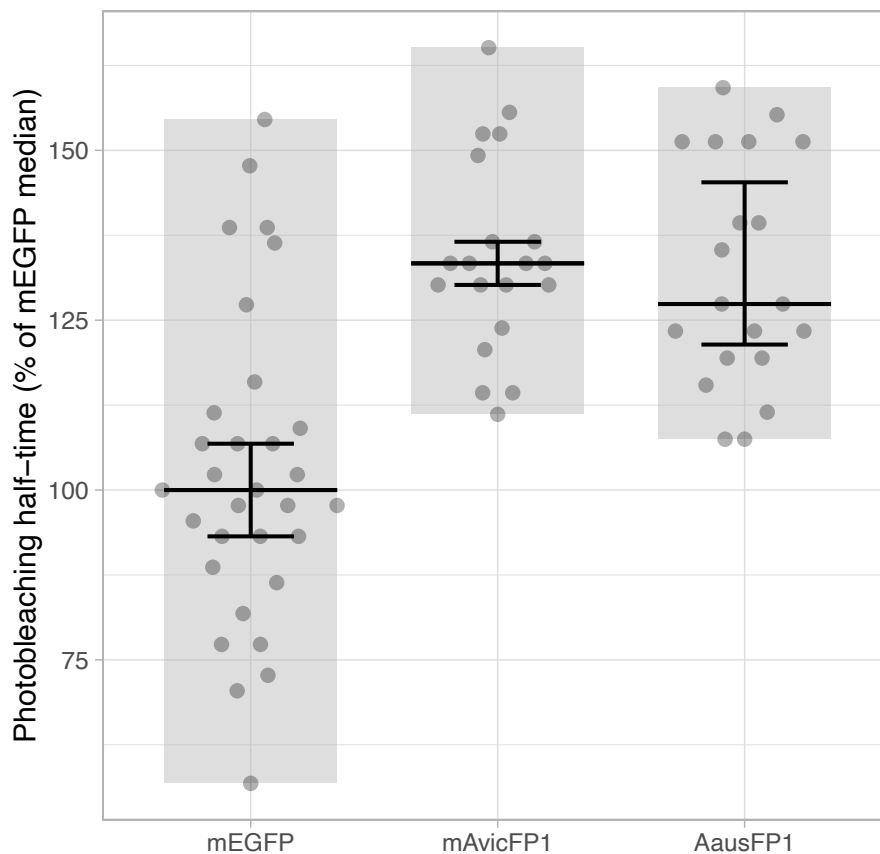

**Fig. Z.** Widefield photobleaching half-times for FPs expressed in the cytosol, corrected for molecular brightness and scaled to the median value for mEGFP. The data underlying this figure may be found in **S1 Data**.

## Gel filtration and dynamic light scattering

To better characterize the oligomeric state of soluble recombinant FPs derived from *Aequorea* species, we used high-performance liquid chromatography (HPLC) to run purified samples on a size-exclusion column and measured the approximate molecular weight of each peak using dynamic light scattering (DLS). These experiments revealed that few of the wild-type proteins behaved as simple monomers, dimers, or tetramers. As expected, avGFP runs as a monomer, since this FP is only a weak dimer, and is mostly dissociated even at protein concentrations of  $\sim 2$  mg/ml used in this experiment. AvicFP1 and mAvicFP1 both run as monomers in this experiment as well, with mAvicFP1 displaying what appears to be a mixed population of protein moving through the column. Despite this unusual elution profile, mAvicFP1 is clearly monomeric by dynamic light scattering in this experiment, indicating that this elution profile may not be related to oligomerization. Like avGFP, AausGFP also runs as a monomer, while the remaining *A. cf. australis* FPs run as high molecular weight soluble aggregates or higher-order oligomers. Data are summarized in **Fig. BB**.

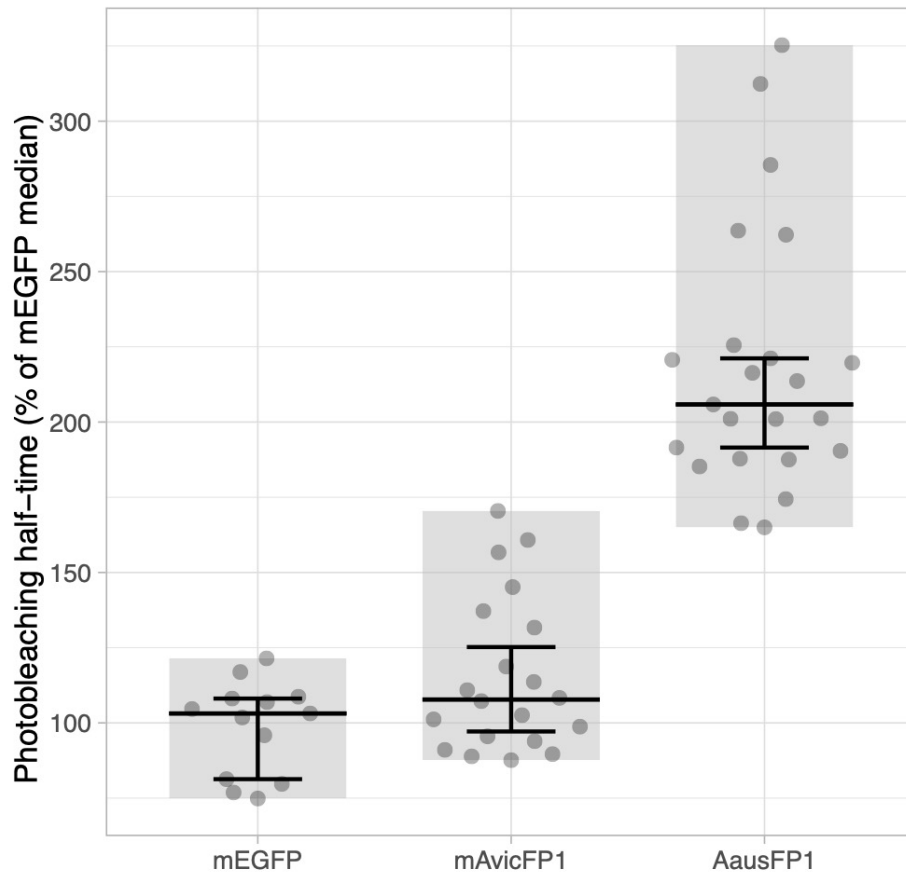

**Fig. AA.** Confocal photobleaching half-times for FPs expressed in the cytosol, corrected for molecular brightness and scaled to the median value for mEGFP. The data underlying this figure may be found in **S1 Data**.

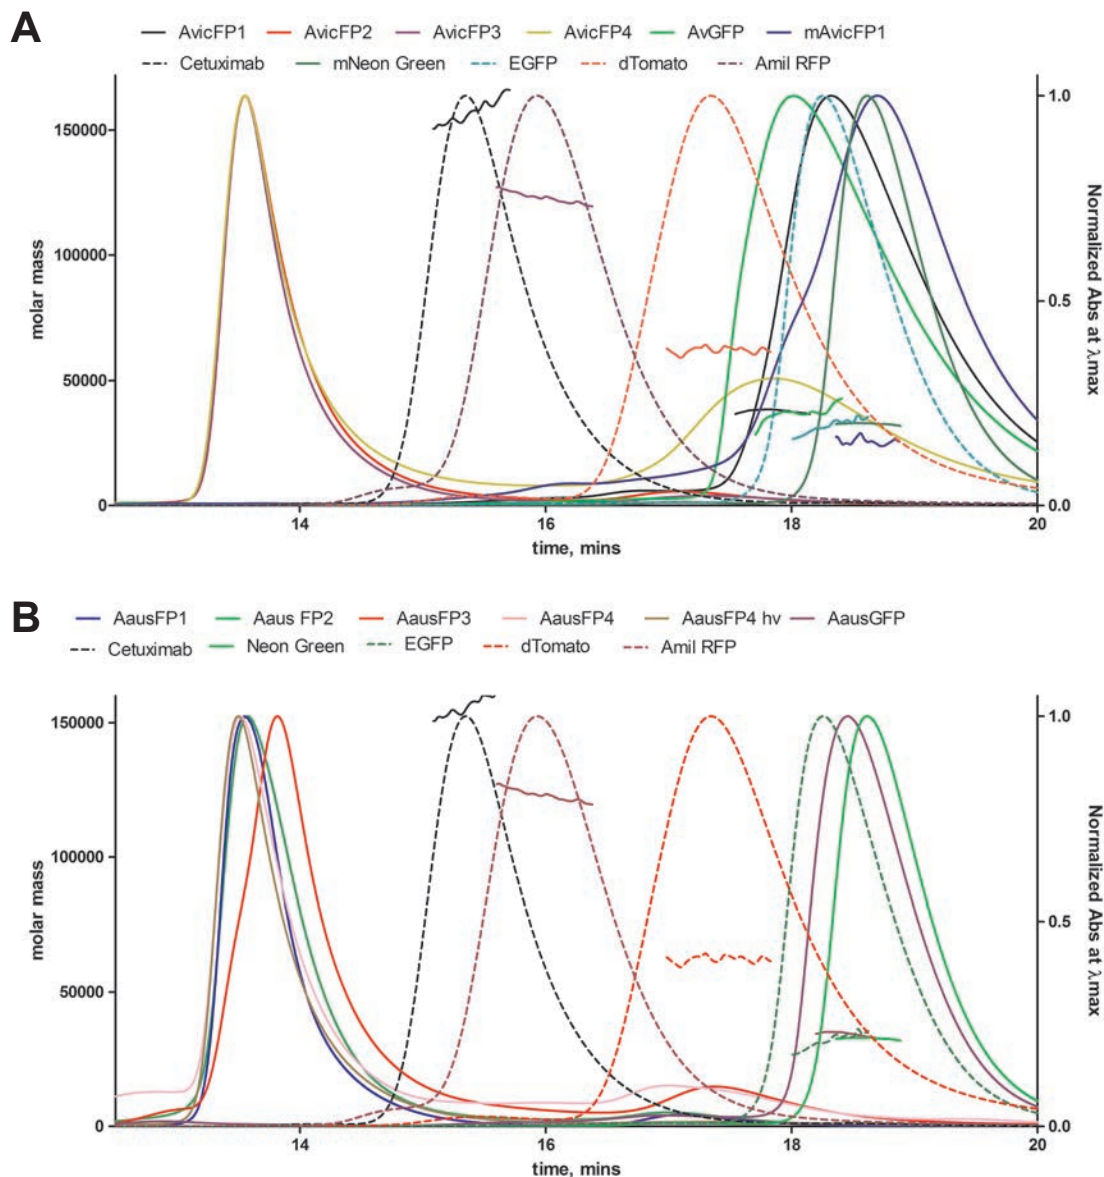

**Fig. BB.** Normalized elution profiles on size-exclusion HPLC (absorbance at peak absorbance, continuous line, axis on right) and estimated molecular weights upon elution by in-line multi-angle light scattering (intermittent line, axis on left) are shown for (A) *A. victoria* and (B) *A. australis* fluorescent proteins and chromoproteins. Proteins were analyzed sequentially in duplicate at  $\sim 70 \mu\text{M}$  in 50 mM Na-HEPES, 150 mM NaCl, pH 7.35. Neon Green and EGFP, dTomato and Amil RFP are monomeric, dimeric, and tetrameric controls respectively. Cetuximab, as a highly purified pharmaceutical antibody is a molecular weight standard with MW= 153 kD run prior to each series of samples run in duplicate. Molecular weights are not shown for multimeric peaks that elute before 14.5 min that are at or before the exclusion limit of the column and are not separated from high molecular weight aggregates that contaminate their light scattering signals. Small differences in elution times of proteins with similar molecular weights but different isoelectric points, probably result from the additional ion-exchange properties of this column that are incompletely suppressed by the salt concentration in the elution buffer.



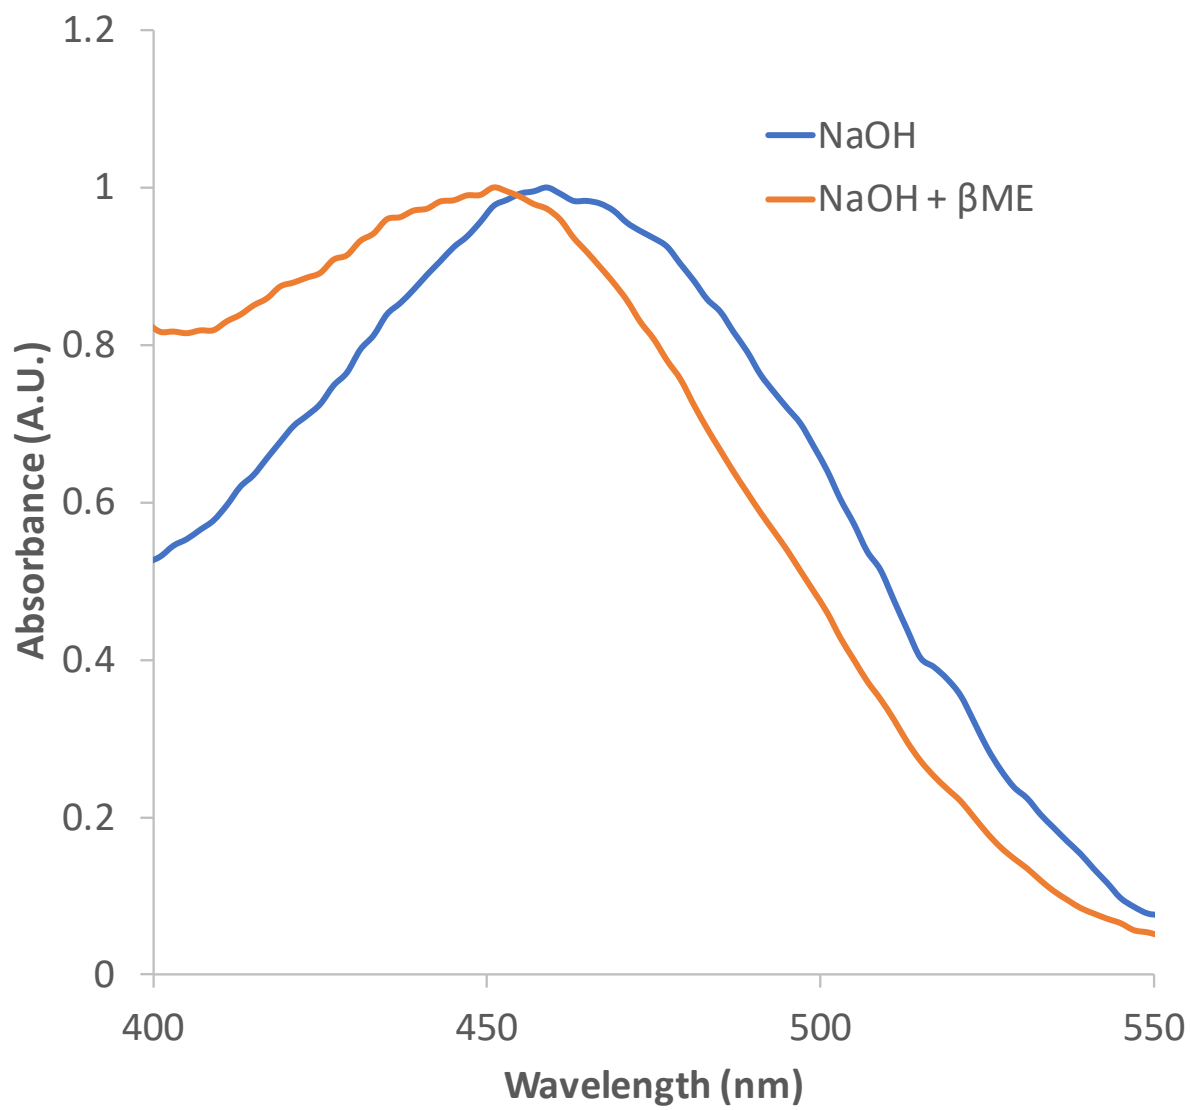

**Figure CC.** Absorbance spectra for alkali-denatured AausFP2 with and without  $\beta$ -mercaptoethanol.

| <b>Primer Name</b> | <b>Sequence</b>                                    |
|--------------------|----------------------------------------------------|
| pNCST-vec-F        | CGTTTGATCCGGCTGC                                   |
| pNCST-vec-R        | ACCCTGGAAGTACAGGTTTTC                              |
| AausFP1-F          | GAAAACCTGTACTTCCAGGGTATGAGTTACGGAGCACTTTTGTTTCAGAG |
| AausFP1-R          | GCAGCCGGATCAAACGTCATGCATATGCGGTTTTGCAATC           |
| AausFP2-F          | GAAAACCTGTACTTCCAGGGTATGGCCTGCGGAGCACTTCTTTTC      |
| AausFP2-R          | GCAGCCGGATCAAACGTCACATGTATTTCAGTGTTGCAATCGACTG     |
| AausFP4-F          | GAAAACCTGTACTTCCAGGGTATGAATTGTGGGGCACTTCTTTTC      |
| AausFP4-R          | GCAGCCGGATCAAACGTCACAAATAAGCGGTTTGACAATCAATTG      |
| AvicFP1-A206K-F    | CCCAGACCAAGATCACCAAGGACCCTAACG                     |
| AvicFP1-A206K-R    | GGTCCTTGGTGATCTTGGTCTGGGTAGACAGG                   |

**Table H.** Primers used in this study.

## Supplementary References

1. Browne ET. HYDROMEDUSAE, WITH A REVISION OF THE WILLIADAE AND PETASIDAE. In: Gardiner JS, editor. The fauna and geography of the Maldive and Laccadive archipelagoes : being the account of the work carried on and of the collections made by an expedition during the years 1899 and 1900. Cambridge :University Press; 1906. p. 722.
2. Kramp PL. Some Medusae from Northern Australia. 1961.
3. Kramp PL, Schmidt J. The hydromedusae of the Pacific and Indian Oceans. 1965.
4. Prasher DC, Eckenrode VK, Ward WW, Prendergast FG, CORMIER MJ. Primary structure of the *Aequorea victoria* green-fluorescent protein. *Gene*. 1992;111: 229–233.
5. Heim R, Cubitt AB, Tsien RY. Improved green fluorescence. *Nature*. Nature Publishing Group; 1995;373: 663–664. doi:10.1038/373663b0
6. Tsien RY. The green fluorescent protein. *Annu Rev Biochem*. 1998;67: 509–544. doi:10.1146/annurev.biochem.67.1.509
7. Cormack BP, Valdivia RH, Falkow S. FACS-optimized mutants of the green fluorescent protein (GFP). *Gene*. 1996;173: 33–38.
8. Zacharias DA. Partitioning of Lipid-Modified Monomeric GFPs into Membrane Microdomains of Live Cells. *Science*. 2002;296: 913–916. doi:10.1126/science.1068539
9. Costantini LM, Fossati M, Francolini M, Snapp EL. Assessing the Tendency of Fluorescent Proteins to Oligomerize Under Physiologic Conditions. *Traffic*. Wiley/Blackwell (10.1111); 2012;13: 643–649. doi:10.1111/j.1600-0854.2012.01336.x
10. Brakemann T, Stiel AC, Weber G, Andresen M, Testa I, Grotjohann T, et al. A reversibly photoswitchable GFP-like protein with fluorescence excitation decoupled from switching. *Nature Biotechnology*. Nature Publishing Group; 2011;29: 942–947. doi:10.1038/nbt.1952
11. Yang F, Moss LG, Phillips GN. The molecular structure of green fluorescent protein. *Nature Biotechnology*. Nature Publishing Group; 1996;14: 1246–1251. doi:10.1038/nbt1096-1246
12. Royant A, Noirclerc-Savoie M. Stabilizing role of glutamic acid 222 in the structure of Enhanced Green Fluorescent Protein. *Journal of Structural Biology*. 2011;174: 385–390. doi:10.1016/j.jsb.2011.02.004
13. Becke AD. Density-functional thermochemistry. III. The role of exact exchange. *J Chem Phys*. American Institute of Physics; 1998;98: 5648–5652. doi:10.1063/1.464913
14. Lee C, Yang W, Parr RG. Development of the Colle-Salvetti correlation-energy formula into a functional of the electron density. *Phys Rev B*. American Physical Society; 1988;37: 785–789. doi:10.1103/PhysRevB.37.785
15. Uchida T. Some Medusae from the Central Pacific (With 13 Textfigures). 1947.

16. Browne ET. Report on the Medusae (Hydromedusae, Scyphomedusae and Ctenophora) Collected by Professor Herdman, at Ceylon, in 1902. Harvard University; 1905.
17. Li H, Durbin R. Fast and accurate long-read alignment with Burrows-Wheeler transform. *Bioinformatics*. 2010;26: 589–595. doi:10.1093/bioinformatics/btp698
18. Walker BJ, Abeel T, Shea T, Priest M, Abouelliel A, Sakthikumar S, et al. Pilon: an integrated tool for comprehensive microbial variant detection and genome assembly improvement. Wang J, editor. *PLoS ONE*. Public Library of Science; 2014;9: e112963. doi:10.1371/journal.pone.0112963
19. Robinson JT, Thorvaldsdóttir H, Winckler W, Guttman M, Lander ES, Getz G, et al. Integrative genomics viewer. *Nature Biotechnology*. Nature Publishing Group; 2011;29: 24–26. doi:10.1038/nbt.1754
20. Kearsse M, Moir R, Wilson A, Stones-Havas S, Cheung M, Sturrock S, et al. Geneious Basic: an integrated and extendable desktop software platform for the organization and analysis of sequence data. *Bioinformatics*. 2012;28: 1647–1649. doi:10.1093/bioinformatics/bts199
21. Thompson JD, Gibson TJ, Higgins DG. Multiple sequence alignment using ClustalW and ClustalX. Baxevanis AD, Davison DB, Page RDM, Petsko GA, Stein LD, Stormo GD, editors. *Curr Protoc Bioinformatics*. John Wiley & Sons, Ltd; 2002;Chapter 2: Unit 2.3–2.3.22. doi:10.1002/0471250953.bi0203s00
22. Ronquist F, Huelsenbeck JP. MrBayes 3: Bayesian phylogenetic inference under mixed models. *Bioinformatics*. 2003;19: 1572–1574. doi:10.1093/bioinformatics/btg180
23. Hasegawa M, Kishino H, Yano T. Dating of the human-ape splitting by a molecular clock of mitochondrial DNA. *J Mol Evol*. 1985;22: 160–174.
24. Madeira F, Park YM, Lee J, Buso N, Gur T, Madhusoodanan N, et al. The EMBL-EBI search and sequence analysis tools APIs in 2019. *Nucleic Acids Research*. 2019. doi:10.1093/nar/gkz268
